# Supplementary material for: Unique post-translational oxime formation in the biosynthesis of the azolemycin complex of novel ribosomal peptides from Streptomyces sp. FXJ1.264
Source: Royal Society of Chemistry journal article supplement (doi:10.1039/c5sc03021h), 2015-10-06
Supplement: c5sc03021h1.pdf [file c5sc03021h1.pdf]

1                    ELECTRONIC SUPPLEMENTARY INFORMATION

2    **Unique post-translational oxime formation in the biosynthesis of the**  
3    **azolemycin complex of novel ribosomal peptides from *Streptomyces* sp.**  
4    **FXJ1.264**

5    Ning Liu,<sup>‡<sup>a</sup></sup> Lijiang Song,<sup>‡<sup>b</sup></sup> Minghao Liu,<sup>‡<sup>a</sup></sup> Fei Shang,<sup>c</sup> Zoe Anderson,<sup>b</sup>  
6    David J. Fox,<sup>b</sup> Gregory L. Challis,<sup>\*<sup>b</sup></sup> and Ying Huang<sup>\*<sup>a</sup></sup>

7  
8    <sup>a</sup>State Key Laboratory of Microbial Resources, Institute of Microbiology, Chinese  
9    Academy of Sciences, Beijing 100101, P. R. China. E-mail: huangy@im.ac.cn; Fax/Tel:  
10    +86 10 64807311

11    <sup>b</sup>Department of Chemistry, University of Warwick, Coventry, UK CV4 7AL. E-mail:  
12    G.L.Challis@warwick.ac.uk; Fax: +44 2476 524112; Tel: +44 2476 574024

13    <sup>c</sup>Analytical and Testing Center, Beijing University of Chemical Technology, Beijing  
14    100029, P. R. China

15    ‡ These authors contributed equally to the work.

16    \*Corresponding authors.

17  
18    **Table of contents**

19    Strains .....2  
20    Growth, extraction and LC-MS analysis of small-scale cultures of *Streptomyces* sp. FXJ1.264 .....2  
21    Isolation of azolemycins from large-scale cultures of *Streptomyces* sp. FXJ1.264 .....3  
22    Structure elucidation of the azolemycins .....3  
23    Nucleic acid manipulations, genome sequencing and annotation .....22  
24    Identification of a putative LAP biosynthetic gene clusters containing an *azmF* homologue .....22  
25    Mutant construction and confirmation .....23  
26    UHPLC-HRMS analyses of azolemycin production by wild type and mutant strains .....26  
27    MS/MS analyses of azolemycin-related metabolites accumulated in the mutants.....26  
28    Antiproliferative and antimicrobial assays.....27  
29    References.....28

## 30 Strains

31 Bacterial strains used and constructed in this study are listed in Table S1. *Streptomyces* sp. FXJ1.264  
32 was isolated from a red-soil sample collected from Yaoli town, Jiangxi Province, China, in 2007. The  
33 isolation medium was GTV agar<sup>1</sup> and the growth medium was GYM agar (0.4% glucose, 0.4% yeast  
34 extract, 1.0% malt extract, 0.2% CaCO<sub>3</sub>, 2% agar, ddH<sub>2</sub>O). The strain was preliminarily identified by  
35 morphology and 16S rRNA gene sequence analysis using standard procedures.<sup>2</sup> The 16S rRNA gene  
36 sequence of *Streptomyces* sp. FXJ1.264 (GenBank accession number HQ537067) showed the highest  
37 similarity (99.86%) to that of the type strain of *Streptomyces cuspidosporus* (GenBank accession  
38 number AB184090).<sup>3</sup>

39

40 **Table S1.** Strains used and constructed in this study

| Strain name                               | Strain description                           | Source     |
|-------------------------------------------|----------------------------------------------|------------|
| <i>E. coli</i> DH5 $\alpha$               | For plasmid propagation                      | 4          |
| <i>E. coli</i> ET12567/pUZ8002            | For conjugal transfer to <i>Streptomyces</i> | 5, 6       |
| <i>Streptomyces</i> sp. FXJ1.264          | Wild-type azolemycin producer                | This study |
| <i>Streptomyces</i> sp. FXJ1.264DM47      | $\Delta$ azmF::neo                           | This study |
| <i>Streptomyces</i> sp. FXJ1.264DM48      | $\Delta$ azmA                                | This study |
| <i>Streptomyces</i> sp. FXJ1.264DM49      | $\Delta$ azmC/D::neo                         | This study |
| <i>Streptomyces</i> sp. FXJ1.264DM51      | $\Delta$ azmE::neo                           | This study |
| <i>Staphylococcus aureus</i> CGMCC 1.2386 | For antimicrobial testing                    | CGMCC      |
| <i>Bacillus subtilis</i> CGMCC 1.2428     | For antimicrobial testing                    | CGMCC      |
| <i>Escherichia coli</i> CGMCC 1.2385      | For antimicrobial testing                    | CGMCC      |
| <i>Candidia albicans</i> CGMCC 2.538      | For antimicrobial testing                    | CGMCC      |
| <i>Candida pseudorugosa</i> CGMCC 2.3107  | For antimicrobial testing                    | CGMCC      |

41

## 42 Growth, extraction and LC-MS analysis of small-scale cultures of *Streptomyces* sp. 43 FXJ1.264

44 Spores of *Streptomyces* sp. FXJ1.264 were spread on two GYM agar plates (the pH of the medium was  
45 adjusted to 5.0-5.1 with HCl prior to sterilization). The resulting cultures were incubated at 28°C for 8  
46 days, then mashed and extracted three times with an equal volume of ethanol. The combined extracts  
47 were concentrated to dryness under vacuum and the residue was re-dissolved in 2 ml of MeOH.

48 1  $\mu$ L of the methanol solution was injected onto an Waters ACQUITY UPLC BEH C18 column  
49 (2.1 mm $\times$ 50 mm, 1.7  $\mu$ m, 45 °C) connected to a Waters ACQUITY UPLC/Xevo G2 QToF MS system  
50 (Waters Corporation, Milford, USA), equipped with an electrospray source. The column was eluted as  
51 follows: 0 min – 95% A + 5% B, 10 min – 0% A + 100% B, where A was water containing 0.1% formic  
52 acid and B was acetonitrile. The full-scan data were acquired in the positive ion mode from 50 to 1200  
53 Da with a 0.2 s scan time, using the following settings: capillary voltage 3.0 kV; de-solvation  
54 temperature 350 °C; sample cone voltage 35 V; extraction cone voltage 4 V; source temperature 120 °C;  
55 cone gas flow 50 L/h; and desolvation gas flow 800 L/h. The mass spectrometer was calibrated across  
56 the mass range of 50–1200 Da using a solution of sodium formate. Data were centroided and  $m/z$   
57 values were corrected during acquisition using an external reference consisting of a 0.2 ng/mL solution  
58 of leucine enkephalin infused at a flow rate of 5  $\mu$ L/min via a lockspray interface, generating a  
59 reference ion at 556.2771 Da ([M+H]<sup>+</sup>). The lockspray scan time was set at 0.5 s, with an interval of 15

60 s, and data were averaged over 3 scans. MS and MS/MS data were acquired using two interleaved scan  
61 functions in the MSE mode. The first scan function was set at 6 eV in order to collect data on the intact  
62 precursor ions in the sample, and the second scan function was ramped from 15eV to 35eV to obtain  
63 fragment ion data from the ions observed in the preceding scan.  
64

## 65 **Isolation of azolemycins from large-scale cultures of *Streptomyces* sp. FXJ1.264**

66 250 Erlenmeyer flasks (500 mL), each containing 100 mL of GYM agar (pH 5.0-5.1), were inoculated  
67 with spores of *Streptomyces* sp. FXJ1.264. After 3 days growth at 28 °C, the agar was mashed with  
68 sterilized knives and the resulting cultures were incubated for a further 8 days at the same temperature.

69 The cultures were combined and extracted with 3 x 25 L of ethanol. The combined extracts were  
70 concentrated under vacuum and fractionated on a silica gel column (100 to 200 mesh; Qingdao  
71 Haiyang Chemical) using a step gradient of CHCl<sub>3</sub>:MeOH from 95:5 to 70:30. Fractions containing the  
72 compounds of interest were combined and passed repeatedly through a Sephadex LH-20 column  
73 eluting with MeOH to remove fatty acids and other lipophilic impurities. The resulting mixture of  
74 azolemycins was separated by HPLC on a Ascentis RP-Amide column (4.6 x 150-mm) connected to a  
75 Shimadzu SPD-M20A instrument eluted with isocratic MeCN/H<sub>2</sub>O (3:1) at a flow rate of 1.0 ml/min,  
76 monitoring absorbance between 190 and 800 nm using a diode array detector, to afford azolemycin A  
77 (122 mg, retention time = 6.00 min), azolemycin B (44 mg, retention time = 4.51 min), azolemycin C  
78 (160 mg, retention time = 6.43 min) and azolemycin D (67 mg, retention time = 9.22 min).

79 Azolemycins A, B, C, and D were further purified using a Supelco Ascentis C18 column (100 x  
80 21.1 mm, 5 μm) connected to an Agilent 1100 HPLC at a flow rate of 5 ml/min, monitoring absorbance  
81 at 268 nm. Mobile phases consisted of A: water containing 0.1% formic acid; and B: acetonitrile  
82 containing 0.1% formic acid. The following program was used to elute the column: 0 min, 80% B; 16  
83 min, 80% B; 18 min, 100% B; 21 min, 100% B; 23 min 80% B; 38 min 80% B. Fractions containing  
84 each azolemycin were identified using ESI-HR-Q-TOF-MS and pooled together. The organic solvent  
85 was removed from each combined fraction using a rotary evaporator and the resulting aqueous  
86 solutions were freeze dried, then immediately analyzed by NMR spectroscopy to minimize oxime  
87 isomerization.  
88

## 89 **Structure elucidation of the azolemycins**

90 High resolution MS analyses established the molecular formula of azolemycins A and B as  
91 C<sub>31</sub>H<sub>39</sub>N<sub>7</sub>O<sub>8</sub>S (*m/z* calculated for C<sub>31</sub>H<sub>40</sub>N<sub>7</sub>O<sub>8</sub>S<sup>+</sup>: 670.2659; *m/z* measured for azolemycin A: 670.2672,  
92 [M+H]<sup>+</sup>; *m/z* measured for azolemycin B: 670.2666, [M+H]<sup>+</sup>) and the molecular formula of  
93 azolemycins C and D as C<sub>32</sub>H<sub>41</sub>N<sub>7</sub>O<sub>8</sub>S (*m/z* calculated for C<sub>32</sub>H<sub>42</sub>N<sub>7</sub>O<sub>8</sub>S<sup>+</sup>: 684.2816; *m/z* measured for  
94 azolemycin C: 684.2830, [M+H]<sup>+</sup>; *m/z* measured for azolemycin D: 684.2815, [M+H]<sup>+</sup>).

95 <sup>1</sup>H, <sup>13</sup>C, COSY, HSQC and HMBC NMR spectra (Figures S1-S5) of a solution of azolemycin A in  
96 CDCl<sub>3</sub> (180 μL) were recorded in a 3 mm tube on a Bruker Avance II 700 spectrometer equipped with  
97 a TCI cryoprobe at 298K. The peak due to residual CHCl<sub>3</sub> in the solvent was used to calibrate the  
98 spectra. Assignments for the <sup>1</sup>H and <sup>13</sup>C resonances observed for azolemycin A are listed in Table S2.  
99

100 **Table S2.** Assignments for signals observed in the  $^1\text{H}$  and  $^{13}\text{C}$  NMR spectra of azolemycin A ( $\text{CDCl}_3$ ,  
 101 700 MHz)

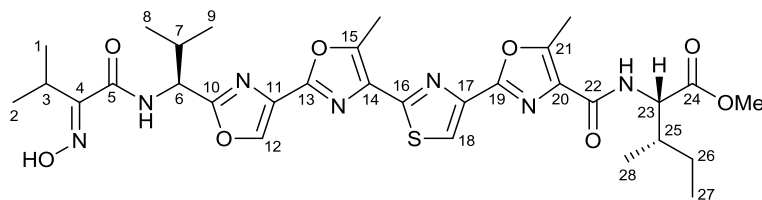

102

| Position | $\delta_{\text{H}}$ /ppm (no. of protons, multiplicity, J/Hz) | $\delta_{\text{C}}$ /ppm |
|----------|---------------------------------------------------------------|--------------------------|
| 1/2      | 1.28 (3H, d, 7.0)                                             | 18.8                     |
| 1/2      | 1.25 (3H, d, 7.0)                                             | 18.2                     |
| 3        | 3.47 (1H, m)                                                  | 25.6                     |
| 4        |                                                               | 158.8                    |
| OH       | 10.02 (1H, broad s)                                           |                          |
| 5        |                                                               | 163.5                    |
| 6-NH     | 7.65 (1H, broad s)                                            |                          |
| 6        | 5.25 (1H, dd, 6.5, 8.5)                                       | 52.7                     |
| 7        | 2.30 (1H, m)                                                  | 33.0                     |
| 8/9      | 0.98 (3H, d, 6.5)                                             | 19.0                     |
| 8/9      | 1.00 (3H, d, 6.5)                                             | 18.4                     |
| 10       |                                                               | 165.4                    |
| 11       |                                                               | 129.8                    |
| 12       | 8.24 (1H, s)                                                  | 138.7                    |
| 13       |                                                               | 153.0                    |
| 14       |                                                               | 130.9                    |
| 15       |                                                               | 148.4                    |
| 15-Me    | 2.89 (3H, s)                                                  | 12.2                     |
| 16       |                                                               | 162.2                    |
| 17       |                                                               | 143.9                    |
| 18       | 7.99 (1H, s)                                                  | 120.2                    |
| 19       |                                                               | 154.4                    |
| 20       |                                                               | 129.9                    |
| 21       |                                                               | 153.7                    |
| 21-Me    | 2.74 (3H, s)                                                  | 11.8                     |
| 22       |                                                               | 161.6                    |
| 23-NH    | 7.52 (1H, d, 9.0)                                             |                          |
| 23       | 4.73 (1H, dd, 5.5, 9.0)                                       | 56.3                     |
| 24       |                                                               | 172.2                    |
| 25       | 2.00 (1H, m)                                                  | 37.9                     |
| 26       | 1.28/1.56 (2 x 1H, 2 x m)                                     | 25.6                     |
| 27       | 0.96 (3H, t, 7.5)                                             | 11.5                     |
| 28       | 0.97 (3H, d, 6.5)                                             | 15.6                     |
| OMe      | 3.76 (3H, s)                                                  | 52.6                     |

103

104

105 **Figure S1.**  $^1\text{H}$  NMR spectrum of azolemycin A

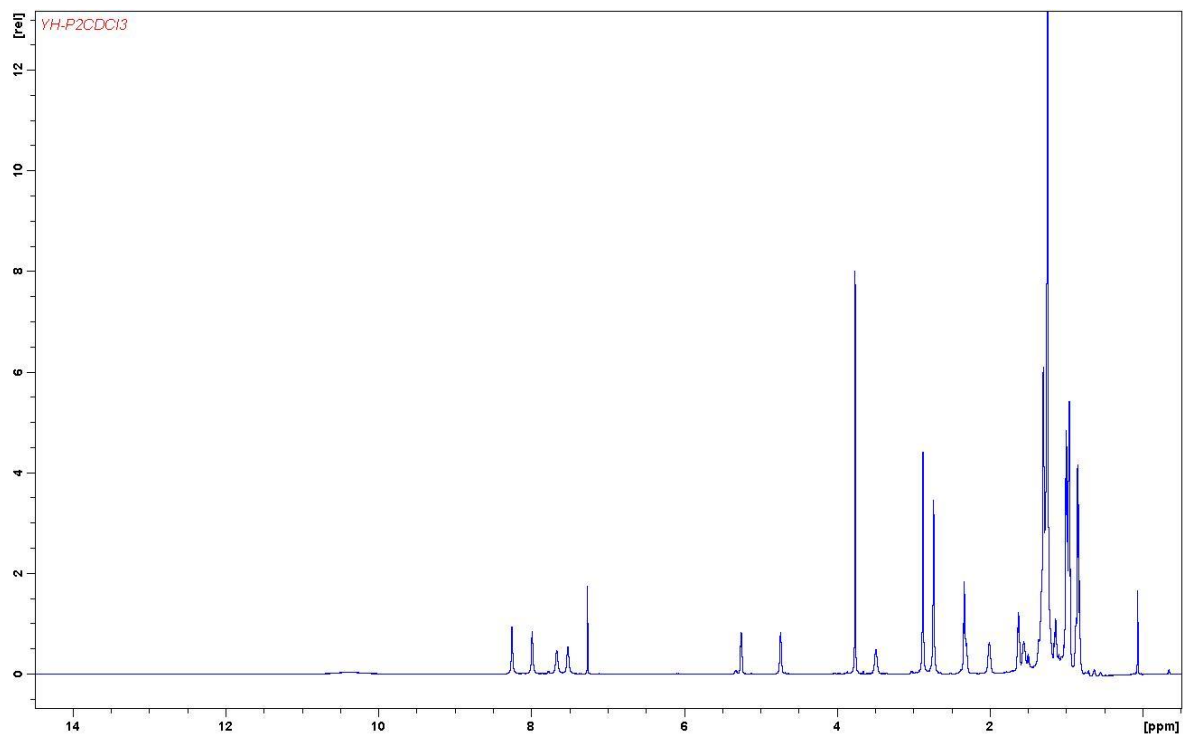

106

107

108 **Figure S2.**  $^{13}\text{C}$  NMR spectrum of azolemycin A

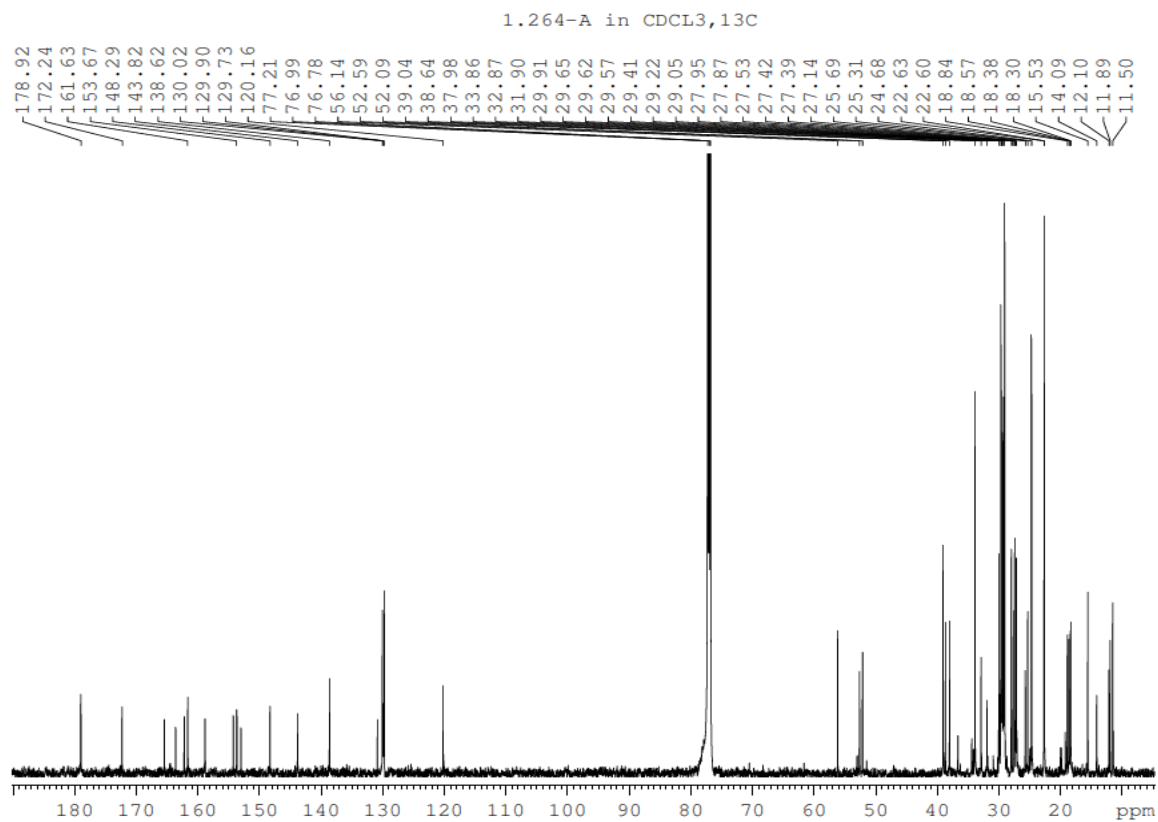

109

110

111

112

113 **Figure S3.** COSY spectrum of azolemycin A

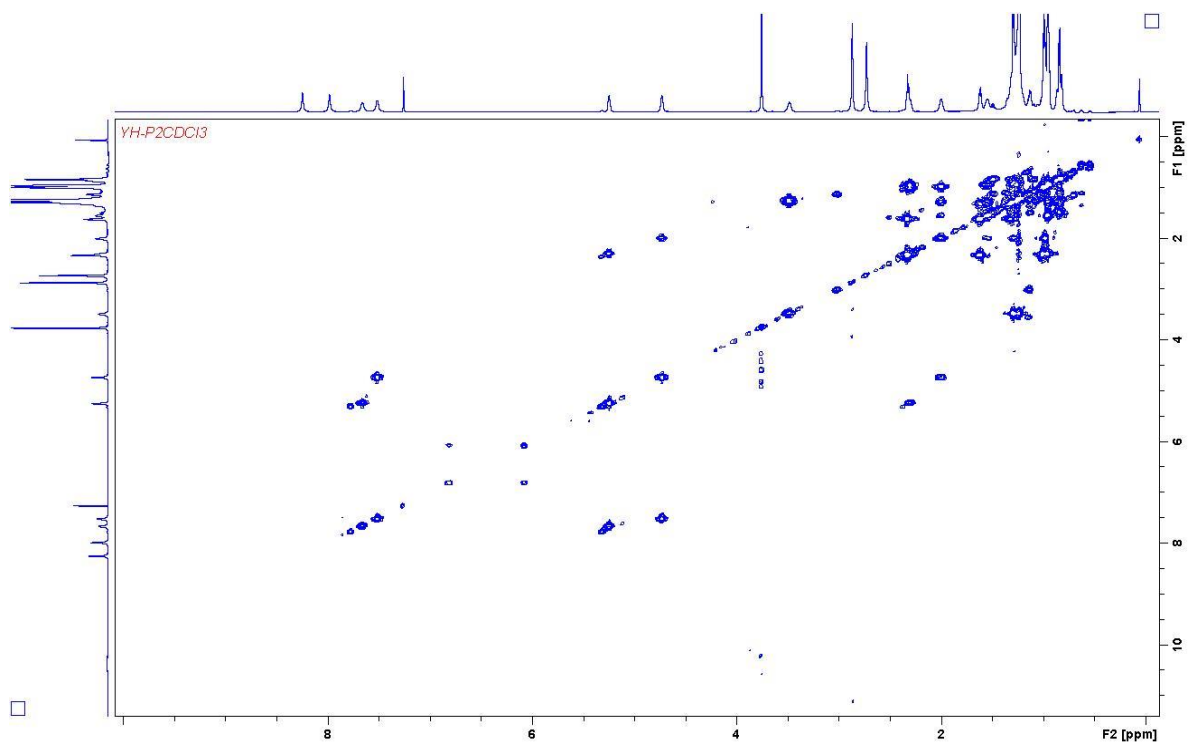

114

115

116 **Figure S4.** HSQC spectrum of azolemycin A

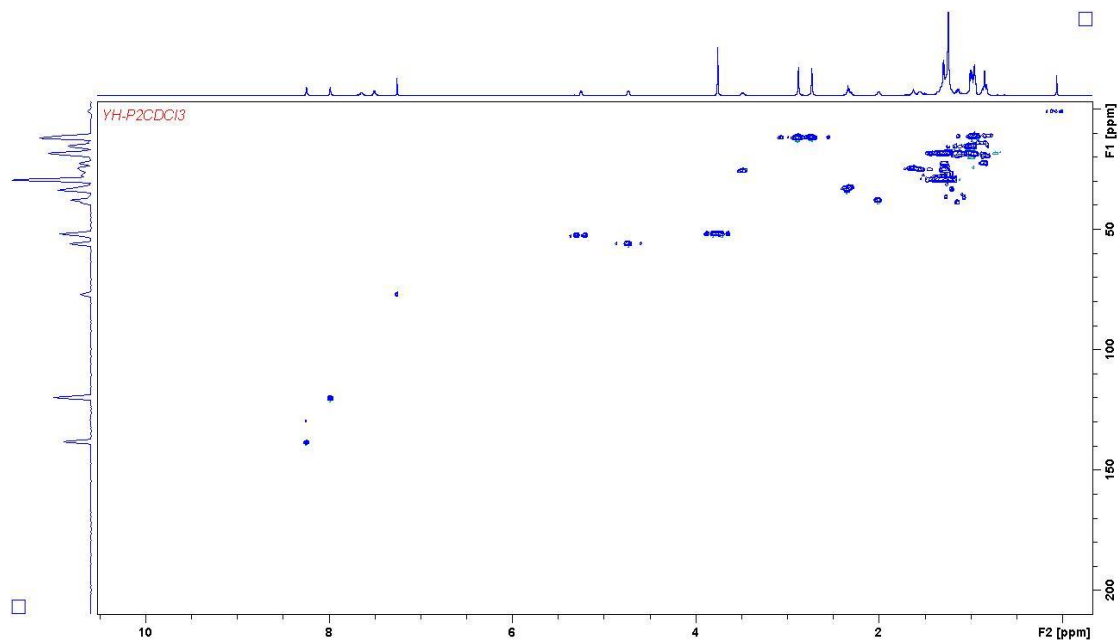

117

118

119

120

121

122

123

124

125 **Figure S5.** HMBC spectrum of azolemycin A

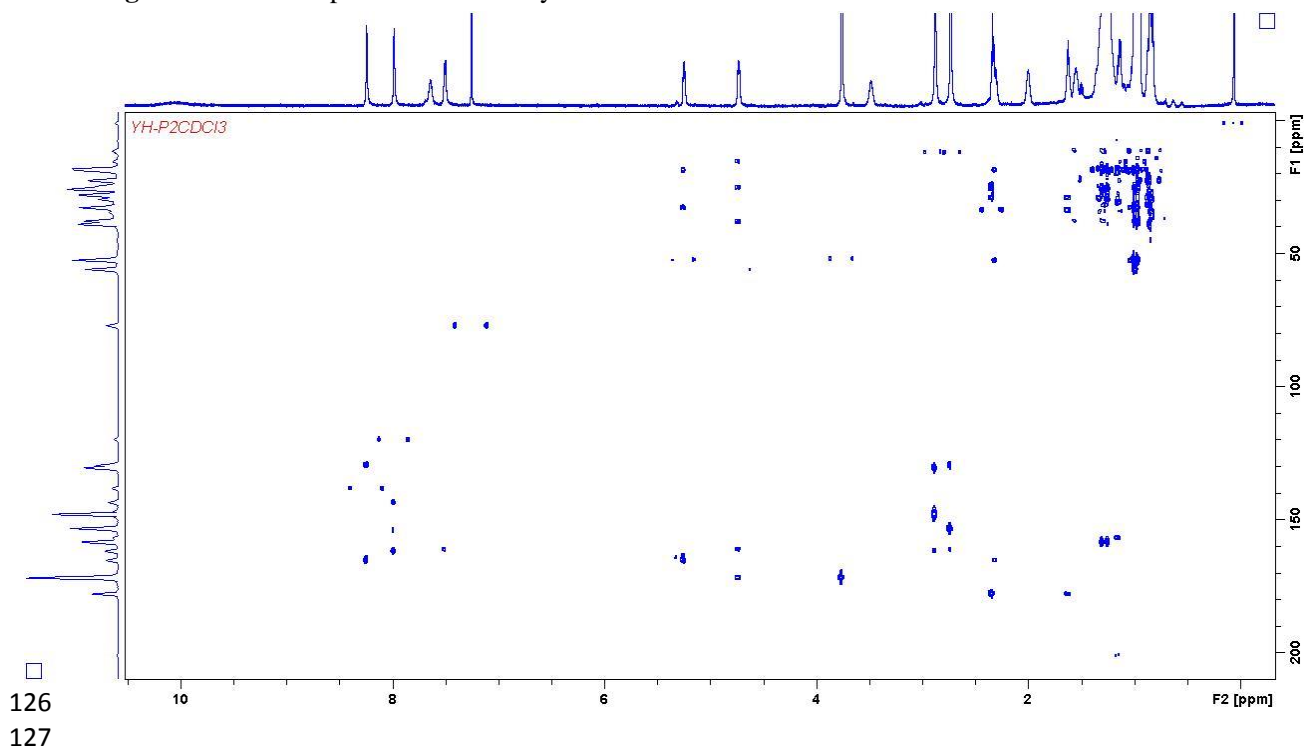

126  
127  
128 To determine the absolute stereochemistry of C-6 and C-23 in azolemycin A, 100  $\mu\text{g}$  of pure  
129 azolemycin A was heated at 110  $^{\circ}\text{C}$  in 6 M HCl for 1 hour. The mixture was evaporated to dryness and  
130 the residue was dissolved in 100  $\mu\text{l}$  of water. 50  $\mu\text{l}$  of the resulting solution was added to 40  $\mu\text{l}$  of 1 M  
131 sodium bicarbonate. 50  $\mu\text{l}$  of 1% 1-fluoro-2-4-dinitrophenyl-5-L-alanine amide (FDAA) in acetone was  
132 added and the mixture was incubated for 60 min at 37  $^{\circ}\text{C}$ . The reaction was quenched by adding 40  $\mu\text{l}$   
133 of 1 M HCl. 400  $\mu\text{l}$  of acetonitrile was added and the sample was centrifuged for 10 min at 13,000 rpm.  
134 The supernatant was analyzed by LC-MS using an RP-C18 column (Agilent Zorbax, 100 x 2.1 mm, 1.8  
135  $\mu\text{m}$ ), attached to a Dionex 3000 RS UHPLC connected to a Bruker MaXis mass spectrometer (Figures  
136 S6 and S7). 1  $\mu\text{l}$  of sample was injected and the column was eluted at 0.2 ml/min using the following  
137 program: 0 min, 30% B; 40 min, 70% B. Mobile phases consisted of A: water containing 0.1% formic  
138 acid and B: acetonitrile containing 0.1% formic acid. The reaction products were also analyzed on a  
139 homochiral stationary phase (ChiralPACK IC, 5 $\mu\text{m}$ ), but separation of the Marfey's derivatives of L-Ile  
140 and L-*allo*-Ile could not be achieved.

141

142 **Figure S6.** Extracted ion chromatograms at  $m/z = 370.13$  from LC-MS analyses of Marfey's  
143 derivatives of D- and L-valine (top and middle panels, respectively), and the acid hydrolysate of  
144 azolemycin A (bottom panel).

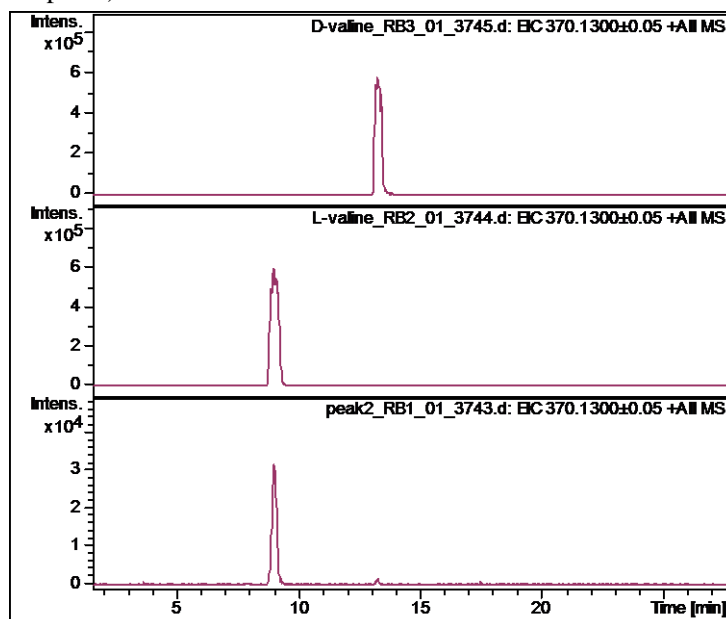

145  
146

147 **Figure S7.** Extracted ion chromatograms at  $m/z = 384.15$  from LC-MS analyses of Marfey's  
148 derivatives of D-*allo*-isoleucine (top panel), D-isoleucine (second from top panel), L-*allo*-isoleucine  
149 (third from top panel), L-isoleucine (second from bottom panel) and the acid hydrolysate of azolemycin  
150 A (bottom panel).

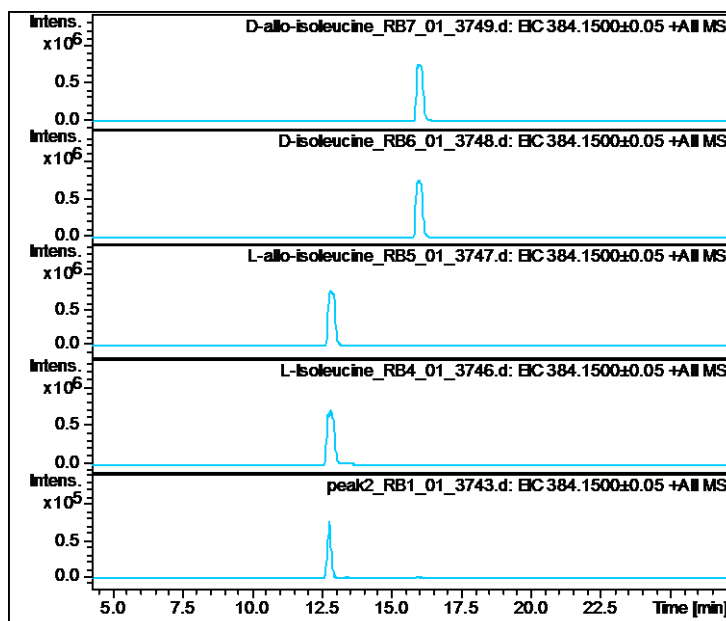

151  
152

153 Azolemycin A was assigned the 2*S* configuration by comparison of the chemical shift for H-23  
154 with the  $\delta_H$  values reported for the corresponding protons in the methyl esters of  
155 N-benzoyl-*allo*-isoleucine and N-benzoyl-isoleucine.<sup>7</sup> To further confirm this stereochemical  
156 assignment, the methyl esters of (2*S*, 3*S*)- and (2*R*, 3*S*)-2-(*N*-(5-Methyl-2-phenyl-oxazole-4-  
157 carboxyamino)-3-methyl-pentanoic acid were synthesized for spectroscopic comparison with the



158 natural product (Scheme S1).

159

160 **Scheme S1.** Synthesis of (2*S*, 3*S*)-2-(*N*-(5-Methyl-2-phenyl-oxazole-4-carboxyamino)-3-methyl-  
161 pentanoic acid methyl ester and a 1:1 mixture of its (2*S*, 3*S*) and (2*R*, 3*S*) isomers

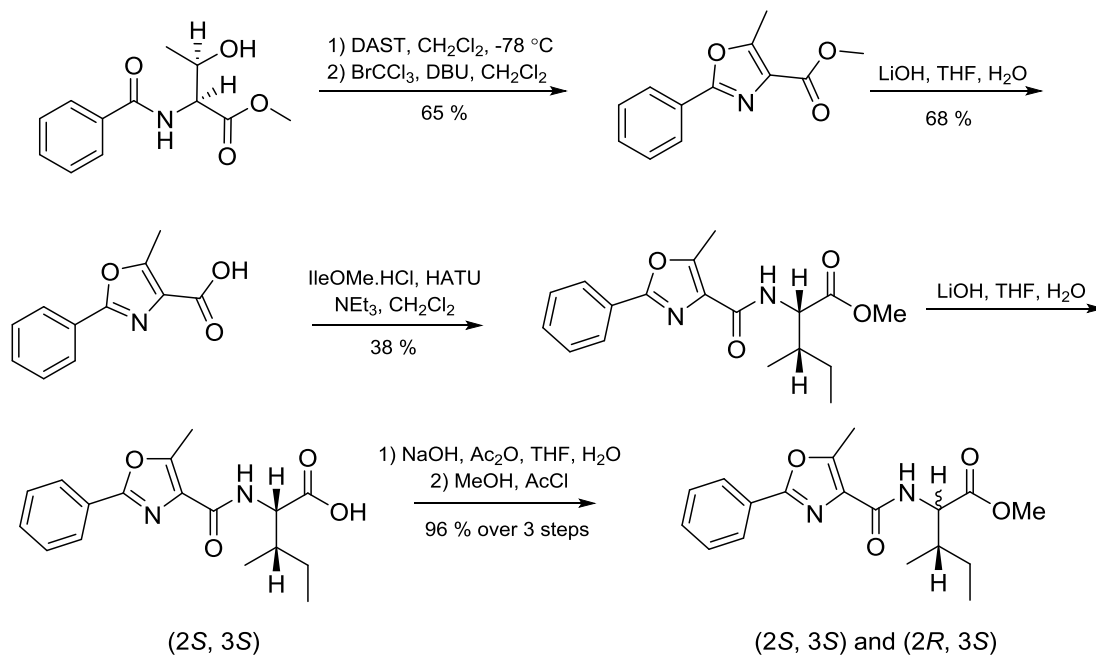

162

163

164 ***N*-Benzoyl-L-threonine methyl ester.** Acetyl chloride (15.6 mL, 200 mmol) was added dropwise  
165 with stirring to MeOH (100 mL) at 0-5 °C. L-Threonine (6.54 g, 54.9 mmol) was added and the  
166 resulting solution was heated to reflux for 2 hours. The reaction mixture was concentrated *in vacuo* to  
167 give L-threonine methyl ester hydrochloride, which was used without further purification; it was  
168 dissolved in CH<sub>2</sub>Cl<sub>2</sub> (160 mL) and triethylamine (17.4 mL, 125 mmol), and the resulting solution was  
169 cooled to 0 °C with stirring. Benzoyl chloride (5.8 mL, 49.9 mmol) was added dropwise and the  
170 reaction mixture was allowed to warm to room temperature over 18 hours. After quenching with  
171 saturated sodium hydrogen carbonate solution (100 mL), the mixture was separated and the aqueous  
172 phase was extracted with CH<sub>2</sub>Cl<sub>2</sub> (2 x 100 mL). The combined organic extracts were concentrated *in vacuo*  
173 and the resulting yellow oil was partitioned between EtOAc (100 mL) and pH 2 buffer (100 mL).  
174 The organic phase was further washed with pH 2 buffer (100 mL), water (100 mL), saturated aqueous  
175 NaHCO<sub>3</sub> solution (2 x 100 mL) and saturated aqueous NaCl solution (100 mL), dried over Na<sub>2</sub>SO<sub>4</sub> and  
176 concentrated *in vacuo* to give the crude product as a yellow oil. Recrystallisation (EtOAc:petroleum  
177 ether) afforded the product as a fluffy white solid (8.03 g, 33.8 mmol, 62 %); mp. 96 - 97 °C (lit.<sup>8</sup> 97 -  
178 98 °C); [α]<sub>D</sub><sup>25</sup> +18.4 (c = 1.02, CHCl<sub>3</sub>), (lit.<sup>9</sup> [α]<sub>D</sub><sup>25</sup> +22.6 (c = 1.0 in CHCl<sub>3</sub>)); ν<sub>max</sub>/cm<sup>-1</sup> 3425 (O-H),  
179 3348 (N-H), 1741 (ester C=O), 1640 (amide C=O), 1521 (N-H); δ<sub>H</sub> (400 MHz, CDCl<sub>3</sub>) 7.91 - 7.78 (2H,  
180 m, *ortho* C-H), 7.55 - 7.48 (1H, m, *para* C-H), 7.46 - 7.41 (2H, m, *meta* C-H), 7.04 (1H, d, *J* 8.5 Hz,  
181 CHNH), 4.82 (1H, dd, *J* 8.5, 2.5 Hz, CHNH), 4.50 - 4.40 (1H, m, CHOH), 3.78 (3H, s, OCH<sub>3</sub>), 2.77  
182 (1H, d, *J* 4.0 Hz, CHOH), 1.28 (3H, d, *J* 6.5 Hz, CHCH<sub>3</sub>); δ<sub>C</sub> (100 MHz, CDCl<sub>3</sub>) 171.7 (CONH), 168.0  
183 (CO<sub>2</sub>Me), 133.7 (*ipso* C), 132.0 (*para* C-H), 128.6 (*ortho* C-H), 127.2 (*meta* C-H), 68.2 (CHOH), 57.7  
184 (CHNH), 52.7 (OCH<sub>3</sub>), 20.0 (CHCH<sub>3</sub>); *m/z* (ESI+) 260.1 ([M+Na]<sup>+</sup>, 100%); HR-ES-MS, *m/z* =  
185 260.0888, (calculated for C<sub>12</sub>H<sub>15</sub>NO<sub>4</sub>Na<sup>+</sup> *m/z* = 260.0893). These data are consistent with a previous  
186 report.<sup>10</sup>

187

188 **5-Methyl-2-phenyl-oxazole-4-carboxylic acid methyl ester.** The method used was modified  
189 from a procedure reported by Deeley *et al.*<sup>11</sup> (Diethylamino)sulfur trifluoride (2.4 mL, 18.0 mmol) was  
190 added dropwise to a stirred solution of *N*-Benzoyl-L-threonine methyl ester (3.6 g, 15.0 mmol) in dry  
191 CH<sub>2</sub>Cl<sub>2</sub> (150 mL) at -78 °C under N<sub>2</sub>. The mixture was stirred at -78 °C for 1.5 hours, then allowed to  
192 reach room temperature and stirred for a further 15 minutes. The reaction was quenched by addition of  
193 saturated sodium bicarbonate solution (80 mL) and separated. The organic phase was dried and  
194 concentrated *in vacuo* to give the crude oxazolidine as a clear oil, which was used immediately without  
195 further purification. Bromotrichloromethane (4.4 mL, 46 mmol) was added to a stirred solution of the  
196 crude oxazolidine in dry CH<sub>2</sub>Cl<sub>2</sub> (150 mL) at 0 °C under N<sub>2</sub> and the mixture was stirred at this  
197 temperature for 5 minutes. 1, 8-Diazabicyclo[5.4.0]undec-7-ene (6.9 mL, 46 mmol) was added  
198 dropwise and the mixture was allowed to warm to room temperature overnight. The reaction was  
199 quenched with 10% aqueous citric acid (80 mL) and the phases were separated. The aqueous phase was  
200 extracted with dichloromethane (2 x 80 mL) and the combined organic extracts were concentrated *in*  
201 *vacuo* to give a dark brown residue. This was partitioned between EtOAc (100 mL) and 10% aqueous  
202 citric acid (80 mL) and the separated organic extract was washed with saturated NaHCO<sub>3</sub> solution (80  
203 mL) and saturated aqueous NaCl solution (80 mL), dried over Na<sub>2</sub>SO<sub>4</sub>, and concentrated *in vacuo*. The  
204 residue was purified by silica chromatography (9:1 hexanes:EtOAc, R<sub>f</sub> = 0.33) to give the product as a  
205 white crystalline solid (2.10 g, 9.7 mmol, 65 % over 2 steps); m.p. 94 - 95°C (lit.<sup>12</sup> 93 - 94°C);  $\nu_{\max}$   
206 /cm<sup>-1</sup> (neat) 2960 (aromatic C-H), 1722 (C=O);  $\delta_{\text{H}}$  (400 MHz, CDCl<sub>3</sub>) 8.14 - 8.02 (2H, m, *ortho* C-H),  
207 7.52 - 7.42 (3H, m, *meta*, *para* C-H), 3.96 (3H, s, OCH<sub>3</sub>), 2.72 (3H, s, CCH<sub>3</sub>);  $\delta_{\text{C}}$  (100 MHz, CDCl<sub>3</sub>)  
208 162.8, 159.6, 156.4 (3 x quaternary C), 130.7 (*para* C-H), 128.7 (*meta* C-H), 128.5 (quaternary C),  
209 126.5 (*ortho* C-H), 52.0 (OCH<sub>3</sub>), 12.1 (CCH<sub>3</sub>). The signal due to one of the quaternary carbon atoms  
210 was not observed due to low relative intensity; *m/z* (ESI+) 240.0 ([M+Na]<sup>+</sup>, 100%), 218.0 ([M+H]<sup>+</sup>,  
211 54%); HR-ESI-MS, *m/z* = 240.0628, (calculated for C<sub>12</sub>H<sub>11</sub>NO<sub>3</sub>Na<sup>+</sup> *m/z* = 240.0631). The data are  
212 consistent with those reported previously.<sup>13</sup>

213

214 **5-Methyl-2-phenyl-oxazole-4-carboxylic acid.** 5-Methyl-2-phenyl-oxazole-4-carboxylic acid  
215 methyl ester (2.04 g, 9.4 mmol) was dissolved in a mixture of 3 M aqueous NaOH solution (20 mL, 60  
216 mmol) and MeOH (32 mL) and the resulting solution was heated to 45 °C for 2 hours. The mixture was  
217 acidified to pH 1 with 12 M aqueous hydrochloric acid and extracted with diethyl ether (3 x 100 mL).  
218 The combined organic extracts were dried over Na<sub>2</sub>SO<sub>4</sub> and concentrated *in vacuo* to give the product  
219 as an off white crystalline solid (1.30 g, 6.4 mmol, 68 %); m.p. 182 - 183 °C (lit.<sup>14</sup> 181.5 - 183 °C);  $\nu$   
220  $\nu_{\max}$ /cm<sup>-1</sup> 2970 (O-H), 1717 (C=O);  $\delta_{\text{H}}$  (400 MHz, DMSO-d<sub>6</sub>) 13.36 - 12.73 (1H, m, CO<sub>2</sub>H), 8.15 - 7.89  
221 (2H, m, *ortho* C-H), 7.68 - 7.25 (3H, m, *meta* and *para* C-H), 2.65 (3H, s, CCH<sub>3</sub>);  $\delta_{\text{C}}$  (100 MHz,  
222 DMSO-d<sub>6</sub>) 163.1, 158.5, 156.2 (3 x quaternary C), 131.0 (*para* C-H), 129.3 (*meta* C-H), 128.8, 126.3  
223 (2 x quaternary C), 126.0 (*ortho* C-H), 12.0 (CCH<sub>3</sub>); *m/z* (ESI+) 204.0 ([M+H]<sup>+</sup>, 100%), 226.0  
224 ([M+Na]<sup>+</sup>, 30%); HR-ESI-MS, *m/z* = 226.0478, (calculated for C<sub>11</sub>H<sub>9</sub>NO<sub>3</sub>Na<sup>+</sup> *m/z* = 226.0475). The  
225 data are consistent with those reported previously.<sup>13</sup>

226

227 **(2S, 3S)-2-(N-(5-Methyl-2-phenyl-oxazole-4-carboxyamino)-3-methyl-pentanoic acid methyl**  
228 **ester.** Acetyl chloride (16.3 mL, 229 mmol) was added dropwise with stirring to MeOH at 0 °C.  
229 L-Isoleucine (5.00 g, 38.1 mmol) was added and the mixture was heated to reflux overnight. The  
230 resulting solution of L-isoleucine methyl ester hydrochloride was concentrated *in vacuo* and used

231 without further purification. A solution of L-isoleucine methyl ester hydrochloride (1.08 g, 6.40 mmol)  
232 and triethylamine (0.9 mL, 6.4 mmol) in CH<sub>2</sub>Cl<sub>2</sub> (20 mL) was added to a stirred and cooled suspension  
233 of HATU (2.4 g, 6.4 mmol) and 5-Methyl-2-phenyl-oxazole-4-carboxylic acid (1.3 g, 6.4 mmol) in  
234 CH<sub>2</sub>Cl<sub>2</sub> (20 mL) at 0-5 °C. The resulting mixture was stirred at 0-5 °C for 15 minutes, then  
235 triethylamine (1.8 mL, 12.8 mmol) was added dropwise and mixture was allowed to warm to room  
236 temperature overnight. To the resulting yellow solution was added pH 2 buffer (100 mL), and the  
237 separated aqueous phase was extracted with CH<sub>2</sub>Cl<sub>2</sub> (2 x 50 mL). The combined organics were  
238 concentrated *in vacuo* and the resulting yellow residue was partitioned between pH 2 buffer (100 mL)  
239 and toluene (100 mL). The separated organic phase was washed with water (2 x 50 mL), saturated  
240 aqueous NaHCO<sub>3</sub> solution (50 mL) and saturated aqueous NaCl solution (50 mL), dried over Na<sub>2</sub>SO<sub>4</sub>  
241 and concentrated *in vacuo*. Purification using silica gel chromatography (2% MeOH: CH<sub>2</sub>Cl<sub>2</sub>) yielded  
242 the product as a colorless oil (0.8 g, 2.4 mmol, 38 %); [α]<sub>D</sub><sup>25</sup> -23.2 (c = 1.1, CHCl<sub>3</sub>); ν<sub>max</sub>/cm<sup>-1</sup> 2964  
243 (N-H), 1740 (ester C=O), 1670 (amide C=O), 1580 (N-H); δ<sub>H</sub> (600 MHz, CDCl<sub>3</sub>) 8.26 - 7.94 (2H, m,  
244 *ortho* C-H), 7.53 (1H, d, *J* 8.5 Hz, CHNH), 7.49 - 7.41 (3H, m, *meta* and *para* C-H), 4.74 (1H, dd, *J* 9.0,  
245 5.5 Hz, NHCH), 3.77 (3H, s, OCH<sub>3</sub>), 2.71 (3H, s, CCH<sub>3</sub>), 2.03 (1H, dqt, *J* 9.5, 7.0, 5.0 Hz, CHCH<sub>3</sub>),  
246 1.56 (1H, dqd, *J* 15.0, 7.0, 4.5 Hz, CHCH<sub>2</sub>), 1.29 (1H, ddq, *J* 15.0, 9.5, 7.5 Hz, CHCH<sub>2</sub>), 1.00 (3H, d,  
247 *J* 7.0 Hz, CHCH<sub>3</sub>), 0.97 (3H, t, *J* 7.5 Hz, CH<sub>2</sub>CH<sub>3</sub>); δ<sub>C</sub> (125 MHz, CDCl<sub>3</sub>) 172.3 (CO<sub>2</sub>Me), 161.8,  
248 158.6, 153.2 (3 x quaternary C), 130.6 (Ar C-H), 129.9 (quaternary C), 128.7 (Ar C-H), 126.8  
249 (quaternary C), 126.4 (Ar C-H), 56.0 (NHCH), 52.1 (OCH<sub>3</sub>), 38.0 (CHCH<sub>3</sub>), 25.2 (CH<sub>2</sub>CH<sub>3</sub>), 15.6  
250 (CHCH<sub>3</sub>), 11.8 (oxazole CH<sub>3</sub>), 11.5 (CH<sub>2</sub>CH<sub>3</sub>); *m/z* (ESI+) 331.1 ([M+H]<sup>+</sup>, 100%), 353.1 ([M+Na]<sup>+</sup>,  
251 85%); HR-ESI-MS, *m/z* = 353.1479, (calculate for C<sub>18</sub>H<sub>22</sub>N<sub>2</sub>O<sub>4</sub>Na<sup>+</sup> *m/z* = 353.1472).

252

253 **Mixture of (2*S*, 3*S*) and (2*R*, 3*S*)-2-(*N*-(5-Methyl-2-phenyl-oxazole-4-carboxyamino)-3-**  
254 **methyl-pentanoic acid methyl ester.** The method used was modified from a procedure reported by du  
255 Vigneaud *et al.*<sup>15</sup> A solution of (2*S*, 3*S*)-2-(*N*-(5-Methyl-2-phenyl-oxazole-4-carboxyamino)-3-  
256 methyl-pentanoic acid methyl ester (0.10 g, 0.29 mmol) in 3 M aqueous NaOH solution (6 mL, 18.2  
257 mmol) and MeOH (5 mL) was heated to 45 °C overnight. The reaction was acidified to pH 1 with 12 M  
258 aqueous hydrochloric acid and extracted with EtOAc (3 x 20 mL). The combined organic extracts were  
259 dried over Na<sub>2</sub>SO<sub>4</sub> and concentrated *in vacuo* to give the acid as a white solid, which was dissolved in 3  
260 M aqueous NaOH solution (0.5 mL, 1.8 mmol), THF (0.5 mL) and water (0.5 mL). Acetic anhydride  
261 was added (0.05 mL, 0.5 mmol) and the resulting mixture was heated to 65 °C for 3 days. The mixture  
262 was cooled to room temperature, acidified with pH 2 buffer (5 mL) and extracted with EtOAc (5 x 10  
263 mL). The combined organics were dried over Na<sub>2</sub>SO<sub>4</sub> and concentrated *in vacuo*. The residue was  
264 dissolved in a solution of acetyl chloride (0.43 mL, 6 mmol) in MeOH (2.5 mL) and heated to reflux  
265 for 18 hours. The mixture was concentrated *in vacuo* to afford the products as a brown oil (0.096 g,  
266 0.28 mmol, 96%, 1:1 (2*S*, 3*S*) and (2*R*, 3*S*) isomers, determined by <sup>1</sup>H NMR spectroscopy); ν<sub>max</sub>/cm<sup>-1</sup>  
267 2962 (N-H), 1739 (ester C=O), 1649 (amide C=O), 1506 (N-H); δ<sub>H</sub> (500 MHz, CDCl<sub>3</sub>) 8.10 - 7.99 ((2*S*,  
268 3*S*), 2H, m, *ortho* C-H; (2*R*, 3*S*), 2H, m, *ortho* C-H), 7.51 - 7.43 ((2*S*, 3*S*), 4H, m, *meta* and *para* C-H,  
269 NHCH; (2*R*, 3*S*), 4H, m, *meta* and *para* C-H, NHCH), 4.85 ((2*R*, 3*S*), 1H, dd, *J* 9.5, 4.5 Hz, NHCH),  
270 4.73 ((2*S*, 3*S*), 1H, dd, *J* 9.0, 5.5 Hz, NHCH), 3.77 ((2*S*, 3*S*), 3H, s, OCH<sub>3</sub>; (2*R*, 3*S*), 3H, s, OCH<sub>3</sub>), 2.72  
271 ((2*S*, 3*S*), 3H, s, CCH<sub>3</sub>; (2*R*, 3*S*), 3H, s, CCH<sub>3</sub>), 2.15 - 1.94 ((2*S*, 3*S*), 1H, m, CHCH<sub>3</sub>; (2*R*, 3*S*), 1H, m,  
272 CHCH<sub>3</sub>), 1.66 - 1.44 ((2*S*, 3*S*), 1H, m, CHCH<sub>2</sub>; (2*R*, 3*S*), 1H, m, CHCH<sub>2</sub>), 1.39 - 1.16 ((2*S*, 3*S*), 1H, m,  
273 CHCH<sub>2</sub>; (2*R*, 3*S*), 1H, m, CHCH<sub>2</sub>), 1.02 - 0.94 ((2*S*, 3*S*), 6H, m, CHCH<sub>3</sub>, CH<sub>2</sub>CH<sub>3</sub>; (2*R*, 3*S*), 6H, m,  
274 CHCH<sub>3</sub>, CH<sub>2</sub>CH<sub>3</sub>); δ<sub>C</sub> (125 MHz, CDCl<sub>3</sub>) 172.7, 172.3 ((2*S*, 3*S*), CO<sub>2</sub>Me; (2*R*, 3*S*), CO<sub>2</sub>Me), 162.0

275 161.8, 158.6, 153.2 ((2*S*, 3*S*), 3 x quaternary C; (2*R*, 3*S*), 3 x quaternary C), 130.6 ((2*S*, 3*S*), Ar C-H;  
276 (2*R*, 3*S*), Ar C-H), 129.9 ((2*S*, 3*S*), quaternary C; (2*R*, 3*S*), quaternary C), 128.7 ((2*S*, 3*S*), Ar C-H; (2*R*,  
277 3*S*), Ar C-H), 126.8 ((2*S*, 3*S*), quaternary C; (2*R*, 3*S*), quaternary C), 126.4 ((2*S*, 3*S*), Ar C-H; (2*R*, 3*S*),  
278 Ar C-H), 56.0, 55.0 ((2*S*, 3*S*), NHCH; (2*R*, 3*S*), NHCH), 52.2, 52.1 ((2*S*, 3*S*), OCH<sub>3</sub>; (2*R*, 3*S*), OCH<sub>3</sub>),  
279 38.0, 37.8 ((2*S*, 3*S*), CHCH<sub>3</sub>; (2*R*, 3*S*), CHCH<sub>3</sub>), 26.3 ((2*S*, 3*S*), CH<sub>2</sub>CH<sub>3</sub>; (2*R*, 3*S*), CH<sub>2</sub>CH<sub>3</sub>), 15.6,  
280 14.8 ((2*S*, 3*S*), CHCH<sub>3</sub>; (2*R*, 3*S*), CH<sub>2</sub>CH<sub>3</sub>), 11.8 ((2*S*, 3*S*), oxazole CH<sub>3</sub>; (2*R*, 3*S*), oxazole CH<sub>3</sub>), 11.7,  
281 11.5 ((2*S*, 3*S*), CH<sub>2</sub>CH<sub>3</sub>; (2*R*, 3*S*), CH<sub>2</sub>CH<sub>3</sub>); *m/z* (ESI+) 353.1 ([M+Na]<sup>+</sup>, 100%), 331.2 ([M+H]<sup>+</sup>, 82%);  
282 HR-ES-MS, *m/z* = 331.1659, (calculate for C<sub>18</sub>H<sub>23</sub>N<sub>2</sub>O<sub>4</sub> *m/z* = 331.1652).

283

284 Comparison of the <sup>1</sup>H NMR spectra for (2*S*, 3*S*)-2-(*N*-(5-Methyl-2-phenyl-oxazole-4-  
285 carboxyamino)-3-methyl-pentanoic acid methyl ester, the mixture of (2*S*, 3*S*)- and (2*R*,  
286 3*S*)-2-(*N*-(5-Methyl-2-phenyl-oxazole-4-carboxyamino)-3-methyl-pentanoic acid methyl esters and  
287 azolemycin A confirmed the (2*S*, 3*S*) stereochemical assignment for the natural product (Figure S8).

288

289 **Figure S8.** Comparison of the pertinent region of the <sup>1</sup>H NMR spectra in CDCl<sub>3</sub> for the mixture of (2*S*,  
290 3*S*)- and (2*R*, 3*S*)-2-(*N*-(5-Methyl-2-phenyl-oxazole-4-carboxyamino)-3-methyl-pentanoic acid methyl  
291 esters (top panel, 400 MHz), (2*S*, 3*S*)-2-(*N*-(5-Methyl-2-phenyl-oxazole-4-carboxyamino)-3-methyl-  
292 pentanoic acid methyl ester (middle panel, 400 MHz) and azolemycin A (bottom panel, 700 MHz)

293

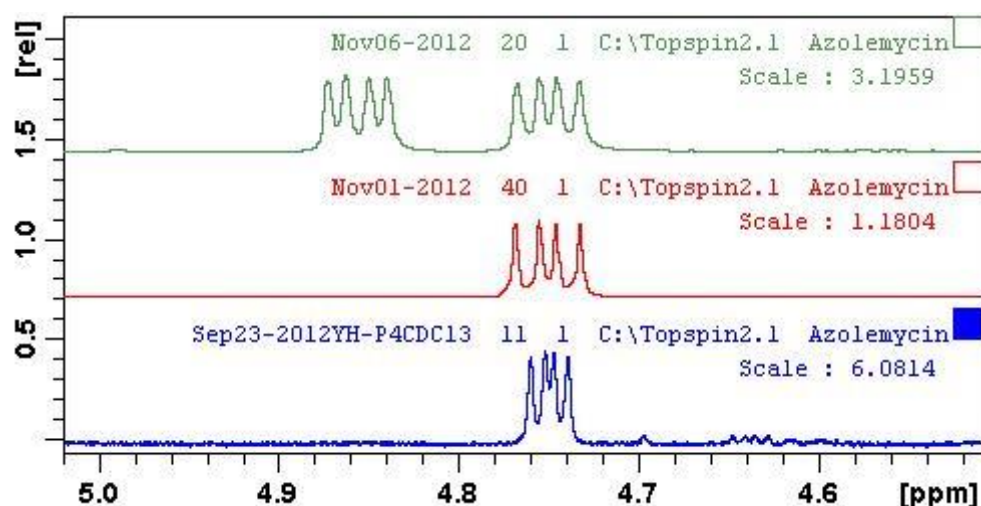

294

295

296 The <sup>1</sup>H NMR spectra of azolemycins A and B were found to be very similar (Figures S1 and S9,  
297 Tables S2 and S3). Only the signals due to protons in the vicinity of the oxime group differed  
298 significantly in chemical shift.

299

300 **Table S3.** Assignments for resonances observed in the  $^1\text{H}$  NMR spectrum of azolemycin B ( $\text{CDCl}_3$ ,  
 301 700 MHz)

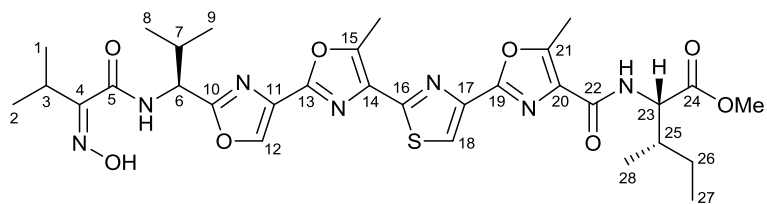

302

| Position | $\delta_{\text{H}}$ /ppm (no. of protons, multiplicity, J/Hz) |
|----------|---------------------------------------------------------------|
| 1/2      | 1.23 (3H, d, 7.0)                                             |
| 1/2      | 1.15 (3H, d, 7.0)                                             |
| 3        | 3.05 (1H, m)                                                  |
| OH       | not observed                                                  |
| 6-NH     | 7.40 (1H, d, 8.5)                                             |
| 6        | 5.21 (1H, dd, 6.5, 8.5)                                       |
| 7        | 2.31 (1H, m)                                                  |
| 8/9      | 0.95 (3H, d, 6.5)                                             |
| 8/9      | 1.04 (3H, d, 6.5)                                             |
| 12       | 8.25 (1H, s)                                                  |
| 15-Me    | 2.88 (3H, s)                                                  |
| 18       | 8.00 (1H, s)                                                  |
| 21-Me    | 2.74 (3H, s)                                                  |
| 23-NH    | 7.53 (1H, d, 9.0)                                             |
| 23       | 4.73 (1H, dd, 5.5, 9.0)                                       |
| 25       | 2.00 (1H, m)                                                  |
| 26       | 1.28/1.56 (2 x 1H, 2 x m)                                     |
| 27       | 0.96 (3H, t, 7.2)                                             |
| 28       | 0.99 (3H, d, 6.3)                                             |
| 24-OMe   | 3.76(3H, s)                                                   |

303

304 **Figure S9.**  $^1\text{H}$  NMR spectrum of azolemycin B

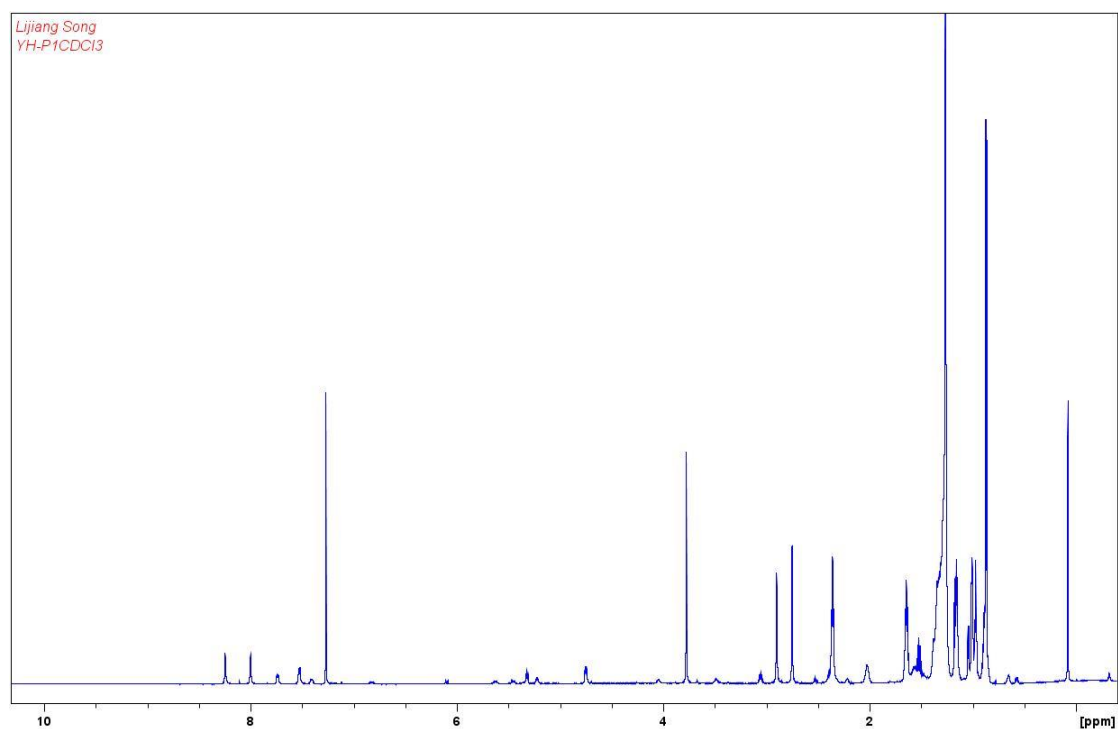

305

306

307

308

309

310

311

312

313

314

315

316

317

318

319

Azolemycin B was assigned as the *Z*-oxime isomer and azolemycin A was assigned as the *E*-oxime isomer on the basis of the comparison of chemical shift values observed for H-3/C-3 and calculated for the corresponding protons/carbons in the oxime derived from condensation of the *N*-methyl amide derivative of  $\alpha$ -ketoisovaleric acid with hydroxylamine (Figure S10, Table S4). Structure conformational searching was done by systematic rotation of all bonds that create distinguishable conformations in Chem3D using the PM3 semi-empirical basis set. PM3 ground-state structures were energy minimized with Firefly using the B3LYP-D3(BJ) functional and the 6-31G+(d,p) basis set (including Hessian and thermochemistry calculations at 298K). DFT ground-state structures were analyzed with the GIAO method in Gaussian03 using the mPW1PW91 functional and the 6-311+G(2d,p) basis set and scrf=(solvent=chcl3,cpcm,read) radii=uaks nosymcav options. NMR shifts were calculated using parameters specific to the functional, basis set and option combination described by Lodewyk *et al.*<sup>16</sup>

320

321

322

323

324

**Figure S10.** Energy minimized structures of the lowest energy conformations of the *Z*- (left) and *E*-oxime (second from left) derived from the condensation of hydroxylamine with the *N*-methyl amide of  $\alpha$ -ketoisovaleric acid, and the *Z*- (second from right) and *E*-*O*-methyloxime (right) derived from the condensation of *O*-methyl-hydroxylamine with the *N*-methyl amide of  $\alpha$ -ketoisovaleric acid.

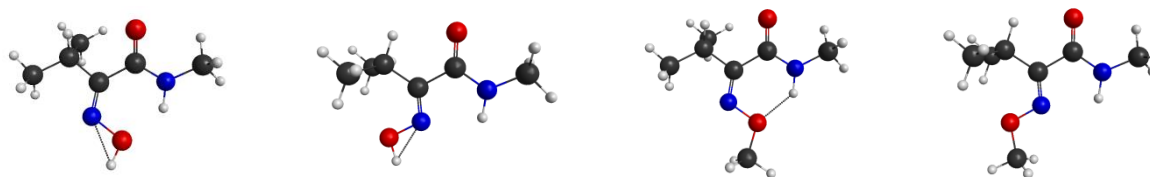

325

326

327 **Table S4.** Comparison of the observed chemical shift values for H-3 and C-3 of azolemycins A and B  
 328 with the calculated chemical shift values for the methine proton and carbon of the *Z*- and *E*-oximes,  
 329 respectively, derived from the condensation of hydroxylamine with the *N*-methyl amide of  
 330  $\alpha$ -ketoisovaleric acid, and the observed chemical shift values for H-3 and C-3 of azolemycins C and D  
 331 with the calculated chemical shift values for the methine proton and carbon of *Z*- and  
 332 *E*-*O*-methyloximes, respectively, derived from the condensation of *O*-methyl-hydroxylamine with the  
 333 *N*-methyl amide of  $\alpha$ -ketoisovaleric acid.  
 334

| Geometry     | B3LYP-D3(BJ)/6-31G+(d,p)                              |          |               |            |          |            |             |                        |                    |             |            |                     |  |  |
|--------------|-------------------------------------------------------|----------|---------------|------------|----------|------------|-------------|------------------------|--------------------|-------------|------------|---------------------|--|--|
| NMR          | mPW1PW91/6-311+G(2d,p) scrf=(solvent=chcl3.cpcm,read) |          |               |            |          |            |             |                        |                    |             |            |                     |  |  |
| intercept 1H | 31.8486                                               |          | intercept 13C |            | 186.0596 |            |             |                        |                    |             |            |                     |  |  |
| slope 1H     | 1.0823                                                |          | slope 13C     |            | 1.0448   |            |             |                        |                    |             |            |                     |  |  |
|              | 631G+dp                                               | G at 298 | total energy  | degeneracy | relative | population | isotropic H | Calculated             |                    | isotropic C | Calculated |                     |  |  |
|              | Hartrees                                              | kJ/mol   | Hartrees      |            | energy   | inc degen. | ppm         | NMR SHIFT              | weighted NMR       | ppm         | NMR SHIFT  | weighted NMR        |  |  |
| Z-Ox111      | -495.847933                                           | 387.617  | -495.7002691  | 2          | 5.2378   | 0.24124526 | 29.1172     | 2.523699529            | 0.214262228        | 151.9146    | 32.680896  | 2.774609848         |  |  |
| Z-Ox121      | -495.846271                                           | 385.87   | -495.6992733  | 1          | 7.8517   | 0.04197731 | 28.7803     | 2.834981059            | 0.0418807          | 148.1755    | 36.259667  | 0.535657978         |  |  |
| Z-Ox211      | -495.838508                                           | 385.702  | -495.6915741  | 2          | 28.062   | 2.3969E-05 | 28.5607     | 3.037882288            | 2.56254E-05        | 150.4978    | 34.036945  | 0.000287112         |  |  |
| Z-Ox212      | -495.849377                                           | 386.17   | -495.7022644  | 2          | 0        |            | 28.2442     | 3.33031507             | 2.34403717         | 151.3348    | 33.235835  | 23.39299137         |  |  |
| Z-Ox221      | -495.83796                                            | 385.223  | -495.691208   | 2          | 29.023   | 1.6259E-05 | 28.9997     | 2.632264622            | 1.5062E-05         | 147.0924    | 37.296325  | 0.000213412         |  |  |
| Z-Ox222      | -495.848338                                           | 386.604  | -495.7010606  | 2          | 3.1601   | 0.5582579  | 29.1341     | 2.508084635            | 0.492749555        | 145.823     | 38.511294  | 7.566101537         |  |  |
|              |                                                       |          |               |            |          | 2.8415207  |             | <b>predicted shift</b> | <b>3.09297034</b>  |             |            | <b>34.26986126</b>  |  |  |
|              |                                                       |          |               |            |          |            |             | <b>OBS SHIFT</b>       | <b>3.05</b>        |             |            | <b>not measured</b> |  |  |
| E-Ox111      | -495.842994                                           | 382.976  | -495.697098   | 1          | 20.16    | 0.00029135 | 27.6491     | 3.880162617            | 0.000843619        | 160.2521    | 24.7009    | 0.005370429         |  |  |
| E-Ox112      | -495.851729                                           | 385.747  | -495.7047781  | 1          | 0        |            | 27.9339     | 3.617019311            | 2.699223891        | 156.8654    | 27.942381  | 20.85218151         |  |  |
| E-Ox221      | -495.844046                                           | 388.891  | -495.6958968  | 1          | 23.313   | 8.1556E-05 | 28.7957     | 2.820752102            | 0.000171676        | 159.5457    | 25.37701   | 0.001544488         |  |  |
| E-Ox222      | -495.852105                                           | 389.406  | -495.7037594  | 1          | 2.6741   | 0.33964907 | 27.9837     | 3.571006191            | 0.905126147        | 157.6603    | 27.181566  | 6.889583676         |  |  |
|              |                                                       |          |               |            |          | 1.34002197 |             | <b>predicted shift</b> | <b>3.605365332</b> |             |            | <b>27.74868011</b>  |  |  |
|              |                                                       |          |               |            |          |            |             | <b>OBS SHIFT</b>       | <b>3.47</b>        |             |            | <b>25.6</b>         |  |  |
| Z-MeOx121    | -535.159045                                           | 453.29   | -534.9863626  | 1          | 3.5581   | 0.23768837 | 29.1348     | 2.507437864            | 0.266341294        | 145.5509    | 38.771727  | 4.118352042         |  |  |
| Z-MeOx211    | -535.137579                                           | 448.756  | -534.9666245  | 2          | 55.37    | 3.8945E-10 | 29.0838     | 2.554559734            | 4.44597E-10        | 145.4752    | 38.844181  | 6.76046E-09         |  |  |
| Z-MeOx21211  | -535.160277                                           | 452.967  | -534.987718   | 2          | 0        |            | 28.2139     | 3.358311004            | 3.001589543        | 151.5176    | 33.060873  | 29.54913057         |  |  |
|              |                                                       |          |               |            |          | 2.23768837 |             | <b>predicted shift</b> | <b>3.267930837</b> |             |            | <b>33.66748261</b>  |  |  |
|              |                                                       |          |               |            |          |            |             | <b>OBS SHIFT</b>       | <b>2.97</b>        |             |            | <b>31.1</b>         |  |  |
| E-MeOx111    | -535.16263                                            | 447.763  | -534.992054   | 1          | 0        |            | 27.9709     | 3.582832856            | 2.709682955        | 156.6724    | 28.127106  | 21.27242377         |  |  |
| E-MeOx121    | -535.162923                                           | 451.335  | -534.9909857  | 1          | 2.8044   | 0.32223323 | 28.2194     | 3.353229234            | 0.817194631        | 156.8911    | 27.917783  | 6.803669247         |  |  |
|              |                                                       |          |               |            |          | 1.32223323 |             | <b>predicted shift</b> | <b>3.526877586</b> |             |            | <b>28.07609302</b>  |  |  |
|              |                                                       |          |               |            |          |            |             | <b>OBS SHIFT</b>       | <b>3.39</b>        |             |            | <b>25.6</b>         |  |  |

335

336

337 To confirm that azolemycins A and B differ only in the configuration of the oxime, a small amount  
338 of each compound was dissolved separately in chloroform, then diluted 100-fold with 5M HCl and  
339 incubated for 4 hours at 42 °C. UHPLC-HRMS analyses showed that in both cases a compound with a  
340 molecular formula corresponding to the ketone resulting from oxime hydrolysis was formed ( $m/z$   
341 calculated for  $C_{31}H_{39}N_6O_8S$ : 655.2545; found: 655.2539) had been formed. These compounds had  
342 identical retention times (Figure S11).

343

344 **Figure S11.** Extracted ion chromatograms at  $m/z = 655.25$  (corresponding to the ketone product of  
345 oxime hydrolysis) from UHPLC-HRMS analyses of the mild acid hydrolysis of azolemycin A (bottom  
346 panel) and azolemycin B (top panel).

347

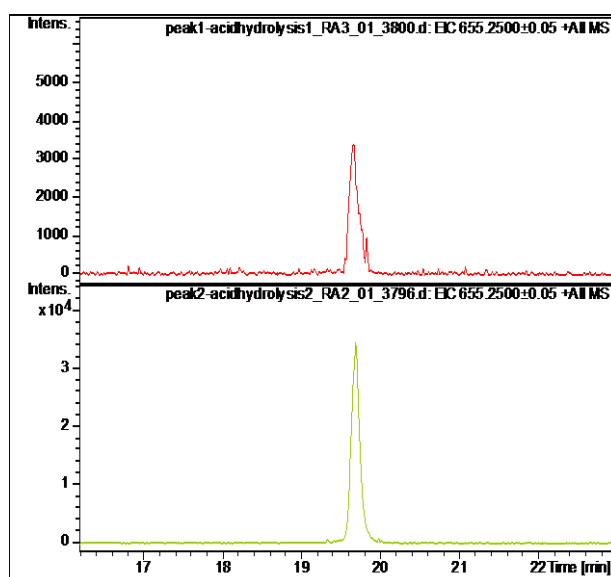

348

349

350 Azolemycins C and D have very similar NMR spectra to azolemycins A (Tables S5 and S6, and  
351 Figures S12-S17). The only significant difference is an additional signal in the spectra for azolemycins  
352 C and D that is attributable to an O-methyl group. Azolemycins C and D are therefore assigned as  
353 derivatives of azolemycins A and B, respectively, in which the oxime is O-methylated.

354



355 **Table S5.** Assignments for signals observed in the <sup>1</sup>H and HSQC/HMBC spectra of azolemycin C  
 356 (CDCl<sub>3</sub>, 700 MHz)

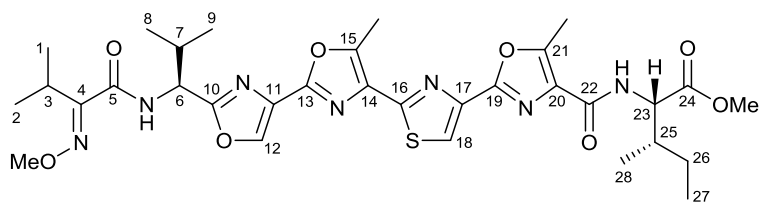

357

| Position | $\delta_H$ /ppm (no. of protons, multiplicity, J/Hz) | $\delta_C$ /ppm* |
|----------|------------------------------------------------------|------------------|
| 1        | 1.24 (3H, d, 7.0)                                    | 18.4             |
| 2        | 1.20 (3H, d, 7.0)                                    | 18.3             |
| 3        | 3.39 (1H, m)                                         | 25.6             |
| 4        |                                                      | 157.6            |
| 4-NOMe   | 3.99 (3H, s)                                         | 62.7             |
| 5        |                                                      | 162.8            |
| 6-NH     | 7.29 (1H, d, 9.0)                                    |                  |
| 6        | 5.19 (1H, dd, 6.5, 9.0)                              | 52.6             |
| 7        | 2.30 (1H, m)                                         | 32.9             |
| 8        | 0.98 (3H, d, 6.5)                                    | 19.0             |
| 9        | 1.00 (3H, d, 6.5)                                    | 18.4             |
| 10       |                                                      | 165.3            |
| 11       |                                                      | 129.8            |
| 12       | 8.23 (1H, s)                                         | 138.6            |
| 13       |                                                      | 153.0            |
| 14       |                                                      | 130.9            |
| 15       |                                                      | 148.2            |
| 15-Me    | 2.88 (3H, s)                                         | 11.8             |
| 16       |                                                      | 161.9            |
| 17       |                                                      | 143.9            |
| 18       | 7.99 (1H, s)                                         | 120.1            |
| 19       |                                                      | 154.3            |
| 20       |                                                      | 129.8            |
| 21       |                                                      | 153.7            |
| 21-Me    | 2.74 (3H, s)                                         | 11.4             |
| 22       |                                                      | 161.7            |
| 23-NH    | 7.51(1H, d, 8.5)                                     |                  |
| 23       | 4.74 (1H, dd, 5.5, 8.5)                              | 56.1             |
| 24       |                                                      | 172.1            |
| 25       | 2.00 (1H, m)                                         | 37.9             |
| 26       | 1.28/1.56 (2 x 1H, 2 x m)                            | 25.4             |
| 27       | 0.96 (3H, t, 7.5)                                    | 11.6             |
| 28       | 0.97 (3H, d, 6.5)                                    | 15.5             |
| 24-OMe   | 3.77 (3H, s)                                         | 52.6             |

358

\* Based on HSQC and HMBC data

359

360

361

362 **Table S6.** Assignments for signals observed in the <sup>1</sup>H and HSQC/HMBC spectra of azolemycin D  
 363 (CDCl<sub>3</sub>, 700MHz)

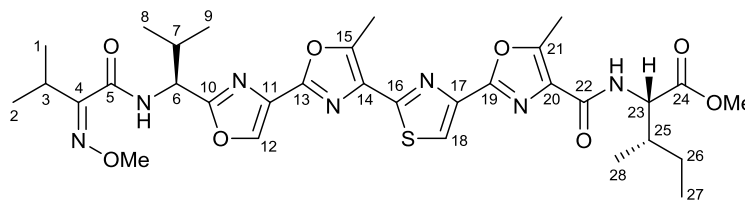

364

| Position | $\delta_{\text{H}}$ /ppm (no. of protons, multiplicity, J/Hz) | $\delta_{\text{C}}$ /ppm* |
|----------|---------------------------------------------------------------|---------------------------|
| 1/2      | 1.14 (3H, d, 7.0)                                             | 19.9                      |
| 1/2      | 1.15 (3H, d, 7.0)                                             | 20.0                      |
| 3        | 2.97(1H, m)                                                   | 31.1                      |
| 4        |                                                               | 156.8                     |
| 4-NOMe   | 3.95 (3H, s)                                                  | 62.4                      |
| 5        |                                                               | 161.8                     |
| 6-NH     | 7.38(1H, d, 8.9)                                              |                           |
| 6        | 5.28(1H, dd, 6.4, 8.9)                                        | 53.0                      |
| 7        | 2.35(1H, m)                                                   | 32.6                      |
| 8        | 1.00(3H, d, 6.7)                                              | 18.8                      |
| 9        | 1.03 (3H, d, 6.7)                                             | 18.4                      |
| 10       |                                                               | 164.8                     |
| 11       |                                                               | 129.9                     |
| 12       | 8.23(1H, s)                                                   | 138.3                     |
| 13       |                                                               | 153.0                     |
| 14       |                                                               | 130.7                     |
| 15       |                                                               | 148.3                     |
| 15-Me    | 2.90(3H, s)                                                   | 12.0                      |
| 16       |                                                               | 162.1                     |
| 17       |                                                               | 143.8                     |
| 18       | 7.99(1H, s)                                                   | 119.9                     |
| 19       |                                                               | 154.0                     |
| 20       |                                                               | 129.9                     |
| 21       |                                                               | 153.5                     |
| 21-Me    | 2.74(3H, s)                                                   | 11.5                      |
| 22       |                                                               | 161.6                     |
| 23-NH    | 7.51(1H, d, 8.8)                                              |                           |
| 23       | 4.74 (1H, dd, 5.4, 8.8)                                       | 55.9                      |
| 24       |                                                               | 172.2                     |
| 25       | 2.00 (1H, m)                                                  | 37.8                      |
| 26       | 1.28/1.56(2H, m)                                              | 25.3                      |
| 27       | 0.96(3H, t, 7.4)                                              | 11.5                      |
| 28       | 0.97(3H, d, 6.3)                                              | 15.5                      |
| 24-OMe   | 3.77(3H, s)                                                   | 52.0                      |

365

\* Based on HSQC and HMBC data

366

367 **Figure S12.**  $^1\text{H}$  NMR spectrum of azolemycin C

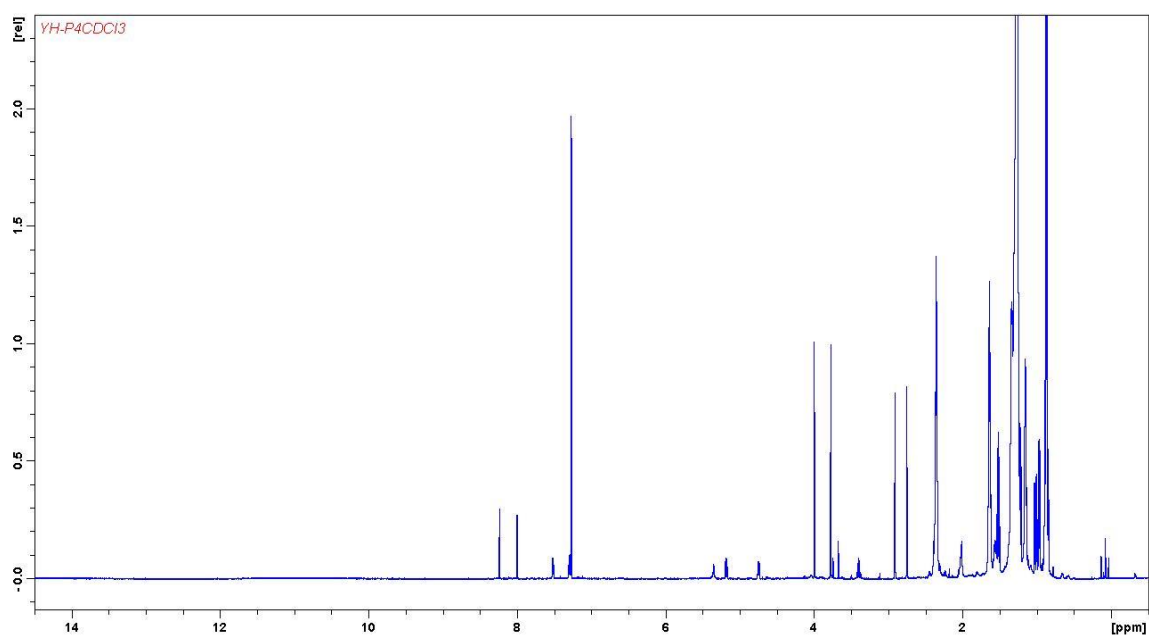

370 **Figure S13.** HSQC NMR spectrum of azolemycin C

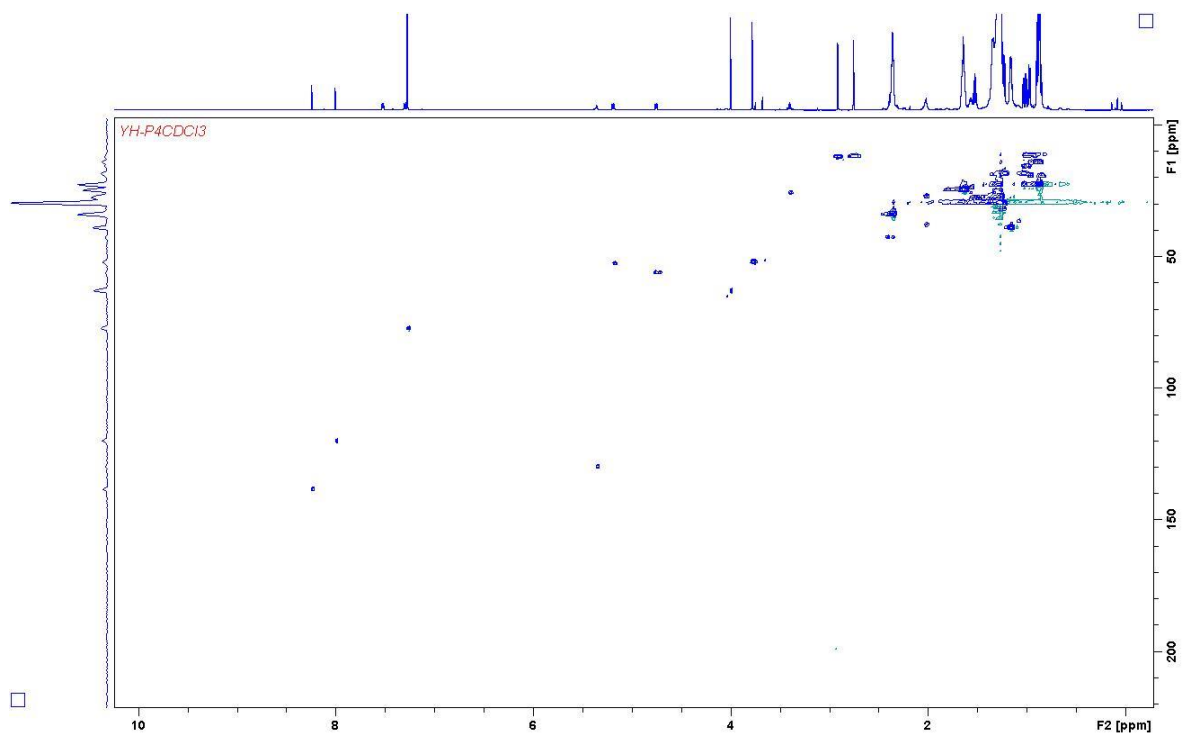

373 **Figure S14.** HMBC NMR spectrum of azolemycin C

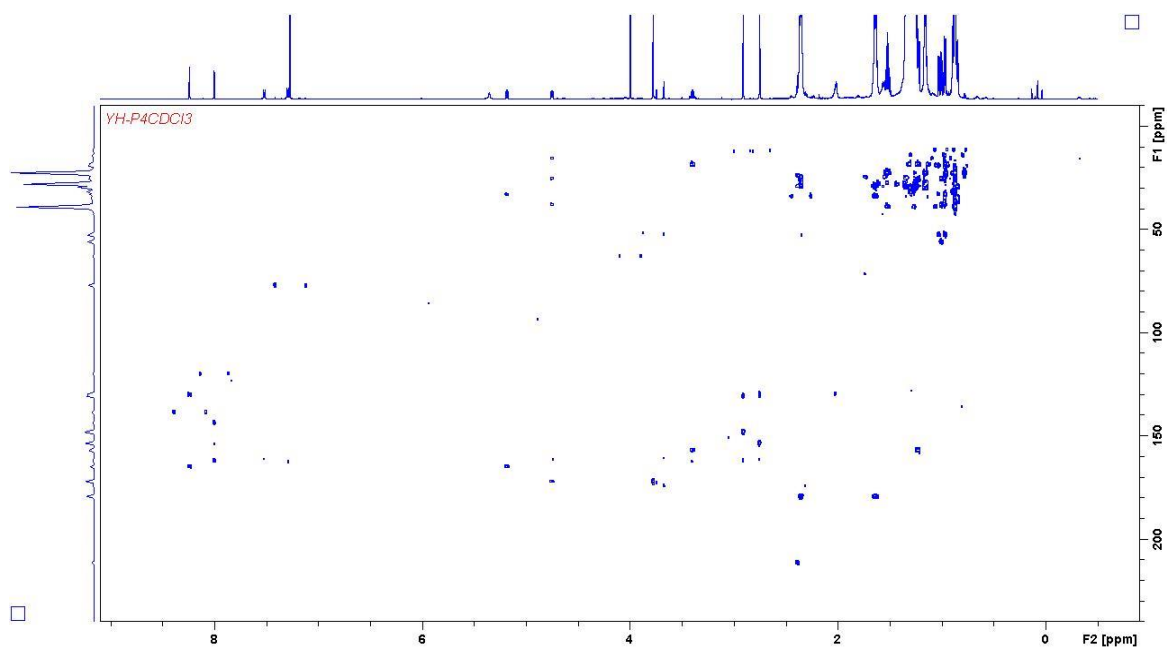

374

375

376 **Figure S15.**  $^1\text{H}$  NMR spectrum of azolemycin D

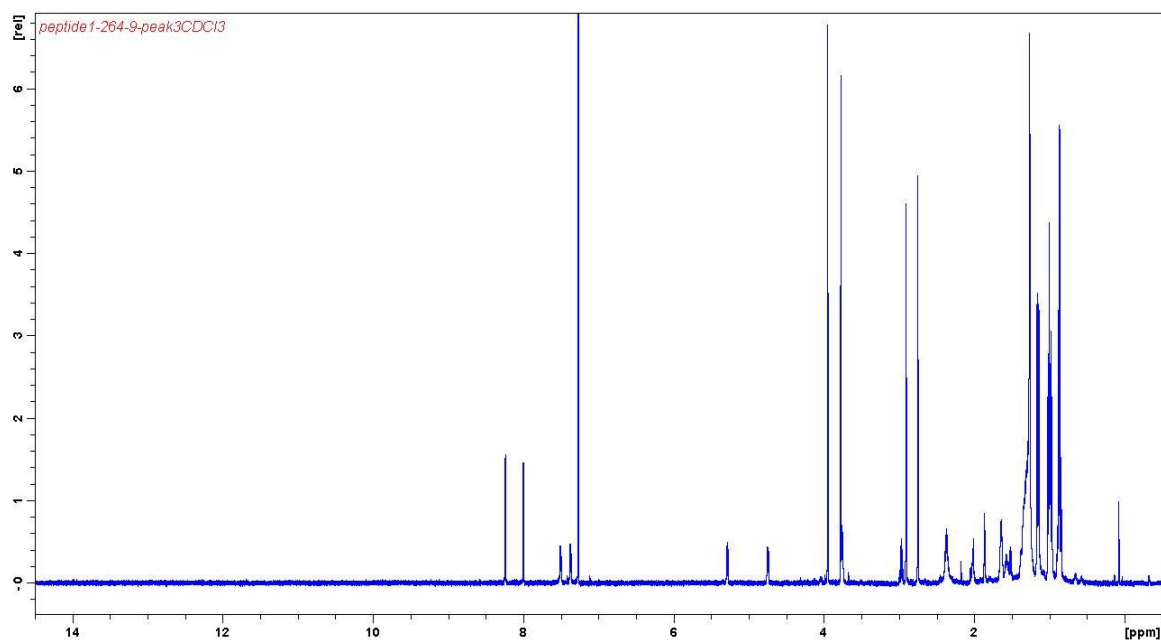

377

378

379 **Figure S16.** HSQC NMR spectrum of azolemycin D

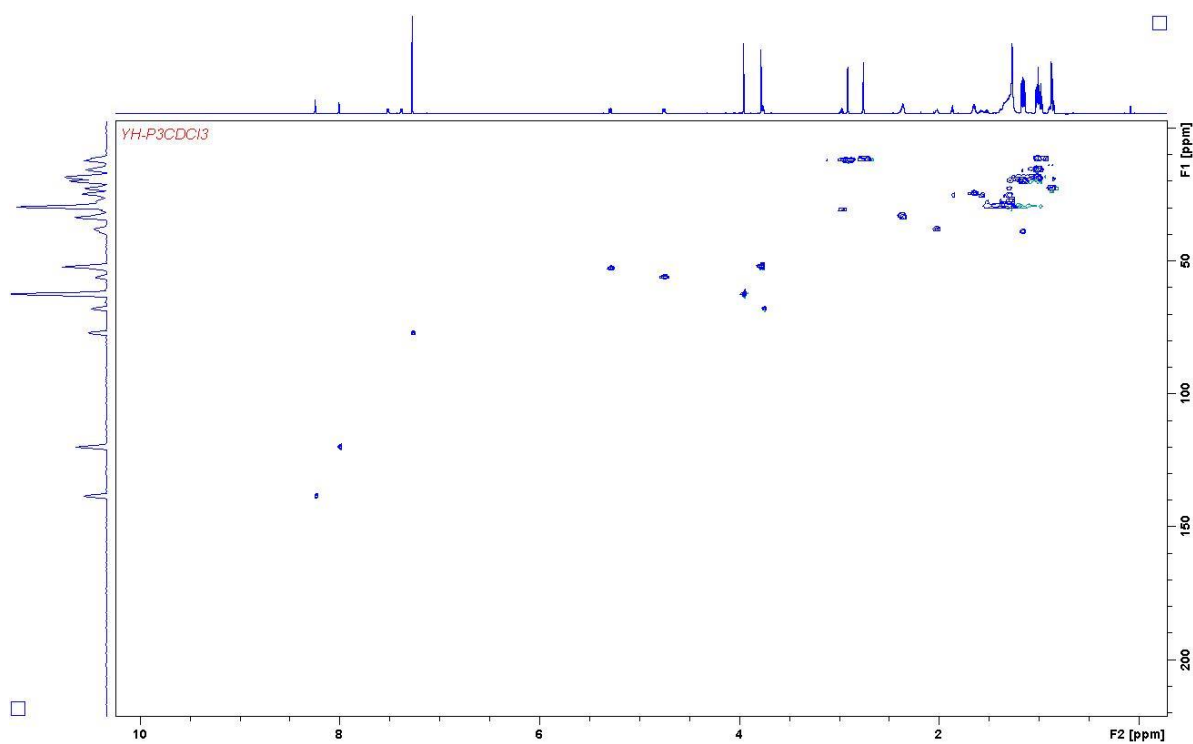

380

381

382 **Figure S17.** HMBC NMR spectrum of azolemycin D

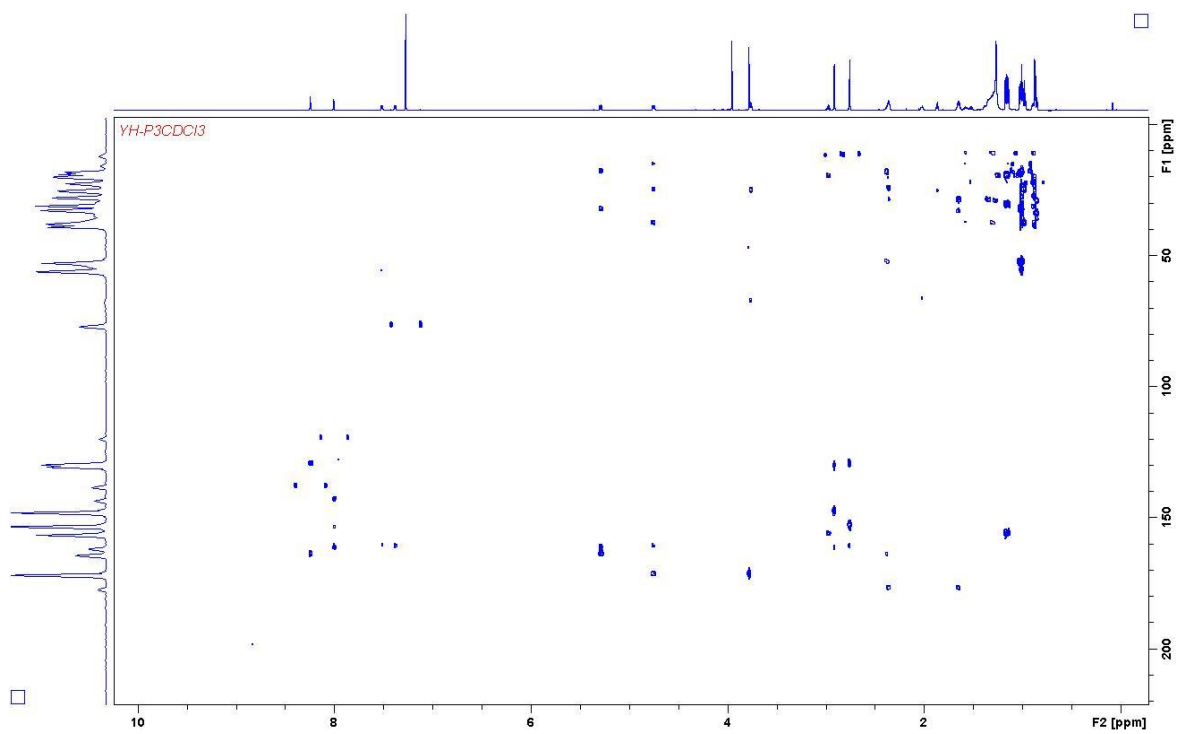

383

384

385

386 **Nucleic acid manipulations, genome sequencing and annotation**

387 Nucleic acid manipulations were performed using standard procedures for *E. coli*<sup>17</sup> and *Streptomyces*<sup>18</sup>,  
 388 or according to the instructions from manufacturers (for restriction enzymes and kits). Roche 454 FLX  
 389 sequencing performed by the Chinese National Human Genome Center (Shanghai, China) resulted in a  
 390 total of 9,436,877 bp of genome sequence distributed across 254 contigs of  $\geq 500$  bp with an average  
 391 size of 37,153 bp. The sequences obtained were analyzed using a combination of Glimmer 3.02,<sup>19</sup>  
 392 Genemark<sup>20</sup> and BLASTP<sup>21</sup> to identify and annotate CDSs, respectively. The proposed functions of  
 393 proteins encoded by genes in the azolemycin biosynthetic gene cluster are listed in Table S7. The  
 394 sequence data of the *azm* gene cluster have been deposited in the GenBank/EMBL/DDBJ database  
 395 under the accession no. KT336319.

396

397 **Table S7.** Proposed functions of proteins encoded by genes in the azolemycin biosynthetic gene cluster

| Gene name     | Size (aa) | Closest homologue (identity/similarity %)      | Source of homologue                         | Proposed function                               |
|---------------|-----------|------------------------------------------------|---------------------------------------------|-------------------------------------------------|
| <i>cds1</i>   | 159       | Hypothetical protein (76/85)                   | <i>Streptomyces himastatinicus</i>          | Not involved                                    |
| <i>cds2</i>   | 1448      | Haloacid dehalogenase (89/92)                  | <i>Streptomyces bingchenggensis</i> BCW-1   | Not involved                                    |
| <i>azmF</i>   | 389       | FAD-binding monooxygenase protein (51/61)      | <i>Stackebrandtia nassauensis</i> DSM 44728 | Oxime formation                                 |
| <i>azmA</i>   | 72        | -                                              | -                                           | Precursor peptide                               |
| <i>azmB</i>   | 400       | SagB-type dehydrogenase (56/65)                | <i>Streptomyces sulphureus</i>              | Azoline oxidation                               |
| <i>azmC/D</i> | 697       | YcaO-domain containing protein (60/68)         | <i>Streptomyces</i> sp. MspMP-M5            | Azoline biosynthesis                            |
| <i>azmE</i>   | 290       | Isoleucine-carboxyl methyl transferase (45/56) | <i>Streptomyces violaceusniger</i> Tu 4113  | Methylation of carboxylic acid and oxime groups |
| <i>azmR</i>   | 339       | LysR family transcriptional regulator (75/83)  | <i>Streptomyces violaceusniger</i> Tu 4113  | Pathway-specific regulator                      |
| <i>cds3</i>   | 345       | Histidinol-phosphate aminotransferase (80/87)  | <i>Streptomyces violaceusniger</i> Tu 4113  | Not involved                                    |

398

399 **Identification of a putative LAP biosynthetic gene clusters containing an *azmF***  
 400 **homologue**

401 The sequence of AzmF was used to search the all genomes database of the Joint Genome Institute  
 402 (<https://img.jgi.doe.gov/cgi-bin/mer/main.cgi?section=FindGenes&page=geneSearch>). The proteins  
 403 encoded by the genes surrounding the top 20 BLAST hits were manually examined to determine  
 404 whether they are homologues of enzymes known to be involved in LAP biosynthesis. This resulted in  
 405 the identification of a single putative LAP biosynthetic gene cluster in the genome of *Actinomadura*  
 406 *oligospora* ATCC 43269. The proposed functions of the proteins encoded by the genes in this gene  
 407 cluster are summarised in Table S8.

408

409

410 **Table S8.** Organisation and proposed functions of the encoded proteins of the putative azolemycin-like  
 411 biosynthetic gene cluster in *Actinomadura oligospora* ATCC 43269

| Gene ID    | Size<br>(aa) | Predicted protein families        | Homologue in the <i>azm</i> pathway<br>(identity/similarity %) | Proposed function                                                                                       |
|------------|--------------|-----------------------------------|----------------------------------------------------------------|---------------------------------------------------------------------------------------------------------|
| 2540954195 | 627          | YcaO-domain containing protein    | AzmC/D (27/35)                                                 | Azoline biosynthesis                                                                                    |
| 2540954196 | 485          | SagB-type dehydrogenase           | AzmB (19/26)                                                   | Azoline oxidation                                                                                       |
| 2540954197 | 62           | -                                 | -                                                              | Precursor peptide                                                                                       |
| 2540954198 | 45           | -                                 | -                                                              | Precursor peptide                                                                                       |
| 2540954199 | 45           | -                                 | -                                                              | Precursor peptide                                                                                       |
| 2540954200 | 46           | -                                 | -                                                              | Precursor peptide                                                                                       |
| 2540954201 | 386          | FAD-binding monooxygenase protein | AzmF (52/61)                                                   | Oxidation of one or more amino group(s) in the LAPs resulting from maturation of the precursor peptides |
| 2540954202 | 157          | Possible lysine decarboxylase     | -                                                              | Unknown                                                                                                 |
| 2540954203 | 162          | Hypothetical protein              | -                                                              | Unknown                                                                                                 |
| 2540954204 | 321          | Transcriptional regulator YafY    | -                                                              | Pathway-specific regulator                                                                              |

412

### 413 **Mutant construction and confirmation**

414 The *azmC/D*, *azmE* and *azmF* mutants were constructed as follows. The *neo* gene, which confers  
 415 kanamycin resistance, was amplified from pUC119::*neo* using primers *neo-BgIII-Forward* and  
 416 *neo-BgIII-Reverse* (Tables S9 and S10).<sup>22</sup> Upstream and downstream regions of approximately 2 kb  
 417 flanking the gene to be deleted were amplified from *S. sp.* FXJ1.264 genomic DNA. The resulting  
 418 fragments overlapped by approximately 50 bp with the target gene. For example, for  $\Delta azmC/D$ , the  
 419 primers used were *azmC/D-L-Forward* with *azmC/D-L-Reverse* and *azmC/D-R-Forward* with  
 420 *azmC/D-R-Reverse* (Table S10). These amplimers were digested with *HindIII/BgIII* or *XbaI/BgIII*, then  
 421 separated by agarose gel electrophoresis and purified from the gel. The resulting DNA fragments were  
 422 ligated with the *BgIII*-digested *neo* amplimer and *XbaI*- and *HindIII*-digested pKC1139 to give  
 423 pKC1139::*azmC/D*::*neo* (Table S9), which was subsequently introduced into *S. sp.* FXJ1.264 via  
 424 conjugation.<sup>18,23</sup> Spores of exconjugants were harvested and spread on ISP 2 agar (yeast extract/malt  
 425 extract agar) containing kanamycin. After incubation at 42 °C for 4 days, apramycin-sensitive (Apr<sup>S</sup>)  
 426 and kanamycin-resistant (Kan<sup>R</sup>) colonies were identified, and further confirmed as *azmC/D* disruption  
 427 mutants ( $\Delta azmC/D$ ) by PCR using primers  $\Delta azmC/D$ -Forward and  $\Delta azmC/D$ -Reverse (Table S10) and  
 428 sequencing of the resulting amplimers. The *azmE* and *azmF* mutants were constructed and verified in  
 429 an analogous manner.

430 A 180 bp in-frame deletion from nucleotide base 1 to 180 of *azmA* was created as described above  
 431 with some modifications. Upstream and downstream regions each of approximately 2 kb accurately  
 432 flanking the *azmA* reading frame were amplified from *S. sp.* FXJ1.264 genomic DNA using primer

433 pairs *azmA*-L-Forward/Reverse and *azmA*-R-Forward/Reverse (Table S10). These amplimers were  
 434 digested with *HindIII*/*BglII* or *XbaI*/*BglII*, then separated by agarose gel electrophoresis and purified  
 435 from the gel. The resulting DNA fragments were ligated with *XbaI*- and *HindIII*-digested pKC1139 to  
 436 give pKC1139::*azmA* (Table S9), which was subsequently introduced into *S. sp.* FXJ1.264 via  
 437 conjugation.<sup>18,23</sup> Spores of exconjugants were harvested and spread on ISP 2 agar without antibiotics.  
 438 After incubation at 42 °C for 4 days, apramycin-sensitive (*Apr<sup>S</sup>*) colonies were identified, and further  
 439 screened and verified as *azmA* in-frame deletion mutants ( $\Delta$ *azmA*) by PCR using primers  
 440  $\Delta$ *azmA*-Forward and  $\Delta$ *azmA*-Reverse (Table S10) and sequencing of the resulting amplimers. In the  
 441 resulting mutant, the 180 bp *azmA* coding sequence was replaced by a 6 bp *BglII* restriction site without  
 442 alteration of the reading frame.<sup>17</sup>

443

444 **Table S9.** Plasmids used and constructed in this study

| Plasmid name                 | Plasmid description                                                                   | Reference     |
|------------------------------|---------------------------------------------------------------------------------------|---------------|
| pKC1139                      | <i>Streptomyces</i> suicide vector; capable of replicating in <i>E.coli</i>           | <sup>18</sup> |
| pUZ8002                      | Enables conjugal transfer of plasmids from <i>E. coli</i> to <i>Streptomyces</i> spp. | <sup>23</sup> |
| pKC1139:: <i>azmA</i>        | <i>azmA</i> deletion construct                                                        | This study    |
| pKC1139:: <i>azmC/D::neo</i> | <i>azmC</i> deletion construct                                                        | This study    |
| pKC1139:: <i>azmE::neo</i>   | <i>azmD</i> deletion construct                                                        | This study    |
| pKC1139:: <i>azmF::neo</i>   | <i>azmE</i> deletion construct                                                        | This study    |
| pUC119:: <i>neo</i>          | Source of <i>neo</i> gene conferring kan <sup>R</sup>                                 | <sup>22</sup> |

445

446



447 **Table S10.** Primers used in this study (restriction sites used are underlined; protective nucleotides are in  
 448 italics)

| Primer name                     | Primer sequence (5'-3')                           |
|---------------------------------|---------------------------------------------------|
| <i>azmA</i> -L-Forward          | <i>CCCAAGCTTCGGACGACGAGGAACTCACCGACGA</i>         |
| <i>azmA</i> -L-Reverse          | <i>GCTCTAGAAGATCTGAGGTTCCGGATCAGGGAAATCCCAAAG</i> |
| <i>azmA</i> -R-Forward          | <i>GAAGATCTTCCACCTGCACCATCAAGATG</i>              |
| <i>azmA</i> -R-Reverse          | <i>GCTCTAGACGGATAGGGGTTTCAGTTCGTC</i>             |
| $\Delta$ <i>azmA</i> - Forward  | <i>CTGGTGGATGTAGAGCGTGGAGAGG</i>                  |
| $\Delta$ <i>azmA</i> - Reverse  | <i>CACACGGATCCATTTCTCAAGTGAGAG</i>                |
| <i>azmC/D</i> -L-Forward        | <i>CCCAAGCTTGCAACCTGGGAGAGGTCACCTTCAG</i>         |
| <i>azmC/D</i> -L-Reverse        | <i>GCTCTAGAAGATCTCGGTGCTGGAGCAGATATAGACATGG</i>   |
| <i>azmC/D</i> -R-Forward        | <i>GAAGATCTGGACGAACTGAACCCCTATCCGCTG</i>          |
| <i>azmC/D</i> -R-Reverse        | <i>GCTCTAGACGACCGCCGCTATGTGCTGCTG</i>             |
| $\Delta$ <i>azmC/D</i> -Forward | <i>ACTTTCCTTGGGTATGGGTTCACT</i>                   |
| $\Delta$ <i>azmC/D</i> -Reverse | <i>GCAGTCCACCAGCACCAGTTTG</i>                     |
| <i>azmE</i> -L-Forward          | <i>CCCAAGCTTACACCCACGACGACCTGGTTCTCCC</i>         |
| <i>azmE</i> -L-Reverse          | <i>GCTCTAGAAGATCTGCAAGCGTTTGGCACACGGCTCTCG</i>    |
| <i>azmE</i> -R-Forward          | <i>GAAGATCT GCTCCTGCCATGACGCCCTGT</i>             |
| <i>azmE</i> -R-Reverse          | <i>GCTCTAGAGTTACCTCGACTCCCGGTATTTTCGC</i>         |
| $\Delta$ <i>azmE</i> -Forward   | <i>CGGCTGATCCATGTGGGCAACATG</i>                   |
| $\Delta$ <i>azmE</i> -Reverse   | <i>ACACCCAACCCGCCGTCAGCTATC</i>                   |
| <i>azmF</i> -L-Forward          | <i>CCCAAGCTTCATCGCCTTCTGCATGGGCAACTGG</i>         |
| <i>azmF</i> -L-Reverse          | <i>GCTCTAGAAGATCTGATGGAGCCCAGCGTGATGCCCC</i>      |
| <i>azmF</i> -R-Forward          | <i>GAAGATCTTGGTGGATGTAGAGCGTGGAGAGGG</i>          |
| <i>azmF</i> -R-Reverse          | <i>GCTCTAGATCGTCCCAGAACGGCACCAGG</i>              |
| $\Delta$ <i>azmF</i> -Forward   | <i>CGGCAGATCATGCTGGTCAACCTGT</i>                  |
| $\Delta$ <i>azmF</i> -Reverse   | <i>CGGCCCTGTGCCATGAAAATGTG</i>                    |
| <i>neo-BglIII</i> -Forward      | <i>GAAGATCTATCCCCTGGATACCGCTCGCCGCAG</i>          |
| <i>neo-BglIII</i> -Reverse      | <i>GAAGATCTTACCCGAACCCAGAGTCCCG</i>               |

449

450 **UHPLC-HRMS analyses of azolemycin production by wild type and mutant strains**

451 The strains were cultured and extracted as described above for growth, extraction and analysis of small  
452 scale cultures. The dried ethanol extracts were re-dissolved separately in 1 ml of methanol and passed  
453 through a 0.4  $\mu\text{m}$  membrane, then analyzed by LC-MS using an RP-C18 column (Agilent Zorbax, 100  
454 x 2.1mm, 1.8  $\mu\text{m}$ ) connected to a Dionex 3000 RS UHPLC coupled with a Bruker MaXis mass  
455 spectrometer. 2  $\mu\text{l}$  of sample was injected and the column was eluted at 0.2 ml/min using the following  
456 program: 0 min, 10% B; 5 min, 10 % B 17 min, 100% B; 22 min, 100% B; 25 min, 10% B. Mobile  
457 phases consisted of A: water containing 0.1% formic acid and B: acetonitrile containing 0.1% formic  
458 acid. The mass spectrometer was calibrated using 20  $\mu\text{L}$  of 10 mM sodium formate solution through  
459 loop injection prior to each run.

460

461 **MS/MS analyses of azolemycin-related metabolites accumulated in the mutants**

462 Spectra were recorded on a Waters ACQUITY UPLC/Xevo G2 QToF MS system, as described above  
463 for growth, extraction and analysis of small scale cultures (Figure S18).

464

465 **Figure S18.** MS/MS spectra of azolemycin-related metabolites produced by wild type *Streptomyces* sp.  
466 FXJ1.264 and the *azmE* and *azmF* mutants. (a) azolemycin A **1**; (b) intermediate **9**; (c) shunt metabolite  
467 **10**; (d) shunt metabolite **11**; (e) shunt metabolite **8**.

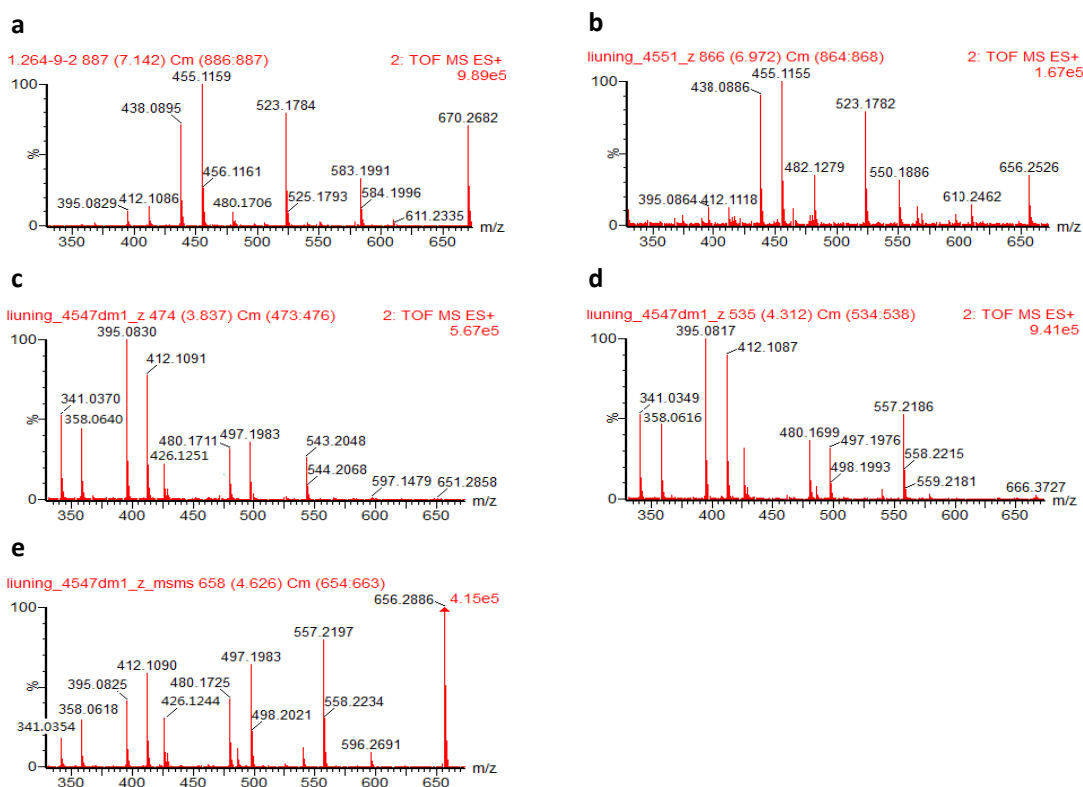

468

469

470 **Antiproliferative and antimicrobial assays**

471 The antiproliferative activity of the compounds was assayed using the MTT method in triplicate (Table  
 472 S11).<sup>24</sup> Each well of a 96-well plate was filled with  $10^4$  cells. After cell attachment overnight, the  
 473 medium was removed, and each well was treated with 50  $\mu$ L of medium containing 0.2% DMSO, or an  
 474 appropriate concentration of one of the test compounds, or the positive control cisplatin (DDP) (10  
 475 mg/ml as a stock solution in DMSO and serial dilutions; the test compounds showed good solubility in  
 476 DMSO and did not precipitate when added to the cells). Cells were incubated at 37 °C for 4 h in a  
 477 humidified incubator at 5% CO<sub>2</sub> and grown for another 48 h after the medium was changed to fresh  
 478 Dulbecco's modified Eagle medium. The medium was removed from the wells and 50  $\mu$ L of a solution  
 479 containing 0.5 mg/mL MTT (Sigma) dissolved in serum-free medium or phosphate-buffered saline  
 480 (PBS) was added to each well. The plate was incubated in the dark at 37 °C for 3 h. Upon removal of  
 481 MTT/medium, 100  $\mu$ L of DMSO was added to each well and the plate was agitated at 60 rpm for 5 min  
 482 to dissolve the precipitate. The absorbance at 540 nm in each well was measured using a microplate  
 483 reader (BioTek Synerge H4).

484 The antimicrobial activity of the compounds was tested using the paper disc diffusion method. 100  
 485  $\mu$ L of the indicator strain at exponential phase were dispersed uniformly on LB agar (1% tryptone, 0.5%  
 486 yeast extract, 1% NaCl, 1.5% agar) in a 9 cm petri-dish. Each compound was dissolved in MeOH at a  
 487 concentration of 2 mg/mL, and 5  $\mu$ L of compound solution were added to a 5 mm paper disc that was  
 488 placed centrally on the agar. After evaporation of MeOH, the plates were incubated for 8-16 hours  
 489 (37°C for bacteria and 30°C for yeasts), and the diameters of the growth inhibition zones were  
 490 measured.

491

492 **Table S11.** IC<sub>50</sub>/ $\mu$ M values for the azolemycins against various mammalian cell lines

| Compound     | Cell line      |                |                |                |                |                |
|--------------|----------------|----------------|----------------|----------------|----------------|----------------|
|              | HCT116         | Hela           | T24            | A549           | SW480          | MCF7           |
| DDP          | 22.7 $\pm$ 1.8 | 3.65 $\pm$ 0.2 | 11.5 $\pm$ 0.2 | 21.6 $\pm$ 1.0 | 19.5 $\pm$ 1.6 | 11.1 $\pm$ 1.3 |
| Azolemycin A | >200           | >200           | >200           | >200           | >200           | >200           |
| Azolemycin B | 69.2 $\pm$ 3.3 | >200           | >200           | >200           | >200           | >200           |
| Azolemycin C | >200           | 96.0 $\pm$ 3.5 | 88.4 $\pm$ 8.5 | >200           | >200           | >200           |
| Azolemycin D | >200           | 93.8 $\pm$ 3.4 | >200           | >200           | >200           | >200           |

493

494

495 **References**

- 496 1. E. Busti, L. Cavaletti, P. Monciardini, P. Schumann, M. Rohde, M. Sosio and S. Donadio, *Int. J.*  
 497 *Syst. Evol. Microbiol.*, 2006, **56**, 1741.
- 498 2. N. Liu, H. Wang, M. Liu, Q. Gu, W. Zheng and Y. Huang, *Int. J. Syst. Evol. Microbiol.*, 2009, **59**,  
 499 254.
- 500 3. H. Wang, N. Liu, L. J. Xi, X. Y. Rong, J. S. Ruan and Y. Huang, *Appl. Environ. Microbiol.*, 2011,  
 501 **77**, 3433.
- 502 4. D. Hanahan, *J. Mol. Biol.*, 1983, **166**, 557.
- 503 5. B. Gust, G. Chandra, D. Jakimowicz, T. Yuqing, C. J. Bruton and K. F. Chater, *Adv. Appl.*  
 504 *Microbiol.*, 2004, **54**, 107.
- 505 6. B. Gust, G. L. Challis, K. Fowler, T. Kieser and K. F. Chater, *Proc. Natl. Acad. Sci. U. S. A.*,  
 506 2003, **100**, 1541.
- 507 7. I. E. Khatskevich, I. K. Kalnin, E. I. Karpeiskaya and E. I. Klabunovskii, *B. Acad. Sci. USSR.*  
 508 *Chem. Sci*, 1983, **32**, 323.
- 509 8. P. G. Andersson, D. Guijarro and D. Tanner, *J. Org. Chem.*, 1997, **62**, 7364.
- 510 9. H. Ait-Haddou, O. Hoarau, D. Cramailère, F. Pezet, J.-C. Daran and G. G. A. Balavoine, *Chem.*  
 511 *Eur. J.*, 2004, **10**, 699.
- 512 10. P. M. T. Ferreira, L. S. Monteiro and G. Pereira, *Eur. J. Org. Chem.*, 2008, **27**, 4676.
- 513 11. J. Deeley, A. Bertram and G. Pattenden, *Org. Biomol. Chem.*, 2008, **6**, 1994.
- 514 12. A. W. Allan and B. H. Walter, *J. Chem. Soc. C*, 1968, 1397.
- 515 13. P. Wipf, A. Cunningham, R. L. Rice and J. S. Lazo, *Bioorg. Med. Chem.*, 1997, **5**, 165.
- 516 14. K. A. Fennell, U. Mollmann and M. J. Miller, *J. Org. Chem.*, 2008, **73**, 1018.
- 517 15. V. du Vigneaud and C. E. Meyer, *J. Biol. Chem.*, 1932, **98**, 295.
- 518 16. M. W. Lodewyk, C. Soldi, P. B. Jones, M. M. Olmstead, J. Rita, J. T. Shaw, and D. J. Tantillo, *J.*  
 519 *Am. Chem. Soc.*, 2012, **134**, 18550.
- 520 17. J. Sambrook, E. F. Fritsch and T. Maniatis, *Molecular cloning*, Cold spring harbor laboratory  
 521 press New York, 1989.
- 522 18. T. Kieser, M. J. Bibb, M. J. Buttner, K. F. Chater and D. A. Hopwood. *Practical Streptomyces*  
 523 *Genetics*, John Innes Foundation, Norwich, 2000.
- 524 19. A. L. Delcher, K. A. Bratke, E. C. Powers and S. L. Salzberg, *Bioinformatics*, 2007, **23**, 673.
- 525 20. J. Besemer and M. Borodovsky, *Nucleic Acids Res.*, 2005, **33**, 451.
- 526 21. S. F. Altschul, T. L. Madden, A. A. Schaffer, J. H. Zhang, Z. Zhang, W. Miller and D. J. Lipman,  
 527 *Nucleic Acids Res.*, 1997, **25**, 3389.
- 528 22. Y. Y. Pan, G. Liu, H. Y. Yang, Y. Q. Tian and H. R. Tan, *Mol. Microbiol.*, 2009, **72**, 710.
- 529 23. M. Bierman, R. Logan, K. O'Brien, E. T. Seno, R. N. Rao and B. E. Schoner, *Gene*, 1992, **116**,  
 530 43.
- 531 24. Y. Wang, Z. Zheng, S. Liu, H. Zhang, E. Li, L. Guo and Y. Che, *J. Nat. Prod.*, 2010, **73**, 920.
